# Supplementary material
Source: Research Square preprint supplement (doi:10.21203/rs.3.rs-8562099/v1)
Supplement: Supplementary file 1 [file 8a4bfefef88f899da9bd73ac.doc]

**Supplementary Information**

**Probiotic-Derived Extracellular Vesicles Mediate the Neuroprotection of *Walnut Green Husk* Polysaccharide via the 5-HT/AQP1/Wnt Signaling Axis in Hippocampus**

Yang Yang1,2, Lishan Jiang1,2, Lin Yu1,2, Linjie Lv1,2, Shanshan Shi1,2, Peirong Xu2,3, Jin He1,2, Ningning Mao1,2, Dan Liu1,2, Tianyu Zhu1,2, Xintong Wang4, Jianmin Wu4,6, Weiyun Zhu7,8, Ruqian Zhao2,3, Deyun Wang1,2*

1 Institute of Traditional Chinese Veterinary Medicine, College of Veterinary Medicine, Nanjing Agricultural University, Nanjing 210095, China

2 MOE Joint International Research Laboratory of Animal Health & Food Safety, Institute of Immunology, Nanjing Agricultural University, Nanjing 210095, China

3 Key Laboratory of Animal Physiology & Biochemistry, Nanjing Agricultural University, Nanjing, 210095, China

4 Key Laboratory of Precision Nutrition and Food Quality, Department of Nutrition and Health, China Agricultural University, Beijing, 100193, China.

5 Neurobiology Laboratory, College of Veterinary Medicine, China Agricultural University, Haidian, Beijing 100193, China

6 State Key Laboratory of Animal Nutrition and Feeding, College of Animal Science and Technology, China Agricultural University, Beijing, 100193, China.

7 Laboratory of Gastrointestinal Microbiology, Jiangsu Key Laboratory of Gastrointestinal Nutrition and Animal Health, College of Animal Science and Technology, Nanjing Agricultural University, Nanjing 210095, China

8 National Center for International Research on Animal Gut Nutrition, Nanjing Agricultural University, Nanjing 210095, China

**Supplementary methods**

2.4. Behavior Tests

To evaluate spatial cognition, anxiety and depressive behavior. The Morris water maze test (MWMT), Elevated plus maze test (EPMT), Forced swimming test (FST), and the Tail suspension test (TST) were enforcement according to our previously studies .

2.4.1 Morris water maze test (MWMT)

To evaluate spatial learning and memory, animals were subjected to the Morris Water maze task following the procedure published previously. The apparatus is composed by a 120 cm diameter circular pool filled with water at 22°C. Animals were undergone the reference memory protocol, which consists of 6 training days (4 trials/day, 30 minutes of inter-trial interval) and a probe trial on the 7th day. During the training the platform remained in the same position in all sessions. The latency to reach the platform with a maximum of 90 s was measured. If the mouse did not reach the platform, it was gently moved through the water and placed in the platform for 10 s. In the probe test, when the mouse reaches the platform and the dwell time reaches 2 s, the camera was stopped and the route was recorded.

2.4.2 Open Field Test (OFT)

To assess the possible effects of chronic constant light on locomotor activity, exploratory drive and anxiety, mice were evaluated in the open-field paradigm. Mice were individually placed in a 40 × 60 × 50 cm wooden box. The floor was divided into 24 rectangles. We counted the number of ambulating (square crossings), rearing (vertical activity), grooming, excreting and the time spent in center area in a 6 min session. To hide animal clues, the apparatus was cleaned with 10% ethanol between tests.

2.4.3 Elevated Plus Maze Test (EPMT)

To evaluate the possible effects of chronic constant light on anxiety responses, mice were subjected to the elevated plus maze task. The experimental apparatus, shaped like a “plus” sign, consisted with two open arms (30 × 5 cm), two equal-sized closed (30 × 5 × 15 cm) arms and a central platform (5 × 5 cm). The elevated plus maze placed at a height of 1 m from the ground. The test consisted of placing a mouse in the central platform and allowing it to freely explore the maze for 5 min. The animal crossing all four paws over the line dividing the central square from the open arm is defined as entering one arm. The time of entries into the open and closed arms were recorded as an indicator of anti-anxiety behavior of animals in this test.

2.4.4 Forced Swimming Test (FST)

To evaluate the depressant-like activity in mice, mice were subjected to the forced swimming test. Mice were individually forced to swim in an open cylindrical container. The container height 25 cm and diameter 10 cm, containing 19 cm of water at 25 ± 1 °C. And the total duration of immobility was measured in 6 min. Mouse was judged to be immobile when it stopped struggling and remained floating motionless in the water, making only keep its head above water. The duration of immobility in the last 5 min of the (total) 6 min of swimming time was recorded with a video camera and record immobility time.

2.4.5 Tail Suspension Test (TST)

The tail suspension test was performed for assessing the depressant-like activity in mice. Mice were suspended by the tail from a ledge with adhesive tape (about 1 cm from the tip of the tail). The distance between the tip of the tail of the mouse and the floor was about 50 cm. Immobility was defined as the absence of movement for 6 min. The duration of immobility in the last 5 min of the (total) 6 min was recorded with a video camera and record immobility time.

**Supplementary Table 1** The primers sequences for RT-PCR

| Target genes | Primer sequences (5’ to 3’) | | GenBank accession |
| --- | --- | --- | --- |
| *Aqp1* | F: GGCATCACCTCCTCCCTAGT | R: GCTGAGCCACCTAAGTCTCG | NM_007472.2 |
| *Fzd1* | F: CTGGATAGGCATCTGGTCCG | R: CCGCATGTCCACTAGGTACG | NM_021457.3 |
| *Wnt1* | F: ATAGCCTCCTCCACGAACCT | R: GATGAACGCTGTTTCTCGGC | NM_021279.4 |
| *Wnt3a* | F: AACTGCACCACCGTCAGCAACA | R: AGCGTGTCACTGCGAAAGCTAC | NM_009522.3 |
| *Wnt10b* | F: CTGTCTCGGGGCAAGACTTT | R: TCCATGTCGTGGTTACAGCC | NM_011718.2 |
| *Dkk2* | F: CTGATGCGGGTCAAGGATTCA | R: CTCCCCTCCTAGAGAGGACTT | NM_020265.4 |
| *Dkk3* | F: GAGATGTTTCGAGAGGTGGAG | R: TTGTGATAGTTGGGAGGTAAGC | NM_001360257.1 |
| *Tph1* | F: ACTGCGACATCAGCCGAGAA | R: CGCAGAAGTCCAGGTCAGAAATC | NM_009414.3 |
| *Tph2* | F: GAGCAGGGTTACTTTCGTCCATC | R: AAGCAGGTCGTCTTTGGGTCA | NM_173391.3 |
| *Mao* | F: GGAGAAGCCCAGTATCACAGG | R: GAACCAAGACATTAATTTTGTATTCTGAC | NM_173740.3 |
| *Slc6a4* | F: TATCCAATGGGTACTCCGCAG | R: CCGTTCCCCTTGGTGAATCT | NM_010484.2 |
| *PPIA* | F: GCAAGACCAGCAAGAAGA | R: CAGTGAGAGCAGAGATTACA | NM_008907 |

**Supplementary Table 2 The primers sequences for RT-PCR of Lactobacillus at species levels**

| Species | Primer sequences (5’ to 3’) | |
| --- | --- | --- |
| *IPC* | F: CAACGCGAAGAACCTTACCAG | R: CCAACATCTCAACGACACGAGC |
| *L. gasseri* | F: TCAAGAGCTGTTAAGGCTGT | R: CTATCGCTTCAAGTGCTTTC |
| *L. rhamnosus* | F: GCCGATCGTTGACGTTAGTTGG | R: CAGCGGTTATGCGATGCGAAT |
| *L. brevis* | F: GGGCAACGAAGCAAGATCGC | R: TTCCAATCGTGTGCACACCA |
| *L. sakei* | F: TCGAACGCACTCTCGTTTAG | R: CGAAACCATCTTTCAACCCT |
| *L. johnsonii* | F: AGAGAGAAACTCAACTTGAAATA | R: CCTTCATTAACCTTAACAGTTAA |
| *L. jensenii* | F: AGTTCTTCGGAATGGACATAG | R: GCCGCCTTTTAAACTTCTT |
| *L. fermentum* | F: GACCAGCGCACCAAGTGATA | R: AGCGTAGCGTTCGTGGTAAT |
| *L. plantarum* | F: GCTGGCAATGCCATCGTGCT | R: TCTCAACGGTTGCTGTATCG |
| *L. paracasei* | F: CAATGCCGTGGTTGTTGGAA | R: GCCAATCACCGCATTAATCG |
| *L. paraplantarum* | F: TTATTCAAGCCGTCGGAGTG | R: TCGCTGGTGCTAATGCAATG |
| *L. casei* | F: CCACAATCCTTGGCTGTTCT | R: GCTTGAGGCGATTGTAATCC |
| *L. curvatus* | F: ACTCTCATTGAATTAGGACGTT | R: CCCGTGTTGGTACTATTTAAT |
| *L. acidophilus* | F: CCTTTCTAAGGAAGCGAAGGAT | R: ACGCTTGGTATTCCAAATCGC |
| *L. salivarius* | F: TACACCGAATGCTTGCATTCA | R: AGGATCATGCGATCCTTAGAGA |
| *L. reuteri* | F: GATTGACGATGGATCACCAGT | R: CATCCCAGAGTGATAGCCAA |
| *L. coryniformis* | F: CAAGTCGAACGCACTGACG | R: ACATTCAGGCCATGTGGTCT |
| *L. farciminis* | F: ACGAATCCGGCAGTCAAGAA | R: AAGAATCGCCAAGCTCTAGG |
| *L. zymae* | F: GCTAAAGCAAGCGCACGATT | R: TCGGCAGTGTGACATGGAG |
| *L. pentosus* | F: GCGGTATCGATTCGATTGGT | R: TGATGTCAATCGCCTCTTGG |
| *L. crustorum* | F: GGAATAGCCCAAACCAGAG | R: ACTGAATGGAGTGGGTCAGA |
| *L. mucosae* | F: ACGGACTTGACGTTGGTTTAC | R: GTGATAGCCGAAACCACCTT |
| *L. buchneri* | F: CAAGTCGAACGCGTCTCCAT | R: CCGAAGCCGTCTTTTAAACC |
| *L. helveticus* | F: CTACTTCGCAGGCGTTAACT | R: GTACTTGATGCTCGCATACC |
| *L. amylovorus* | F: CAAGCACGATTGGCAAGATG | R: ATTGGATTCCGCTTCTGTGG |
| *L. heilongjiangensis* | F: GCTTCATGAATCGGATCTAA | R: TAAACTACGATCATGTGAAAGTA |
| *L. parabuchneri* | F: AGCGTCGTGATTCCTGATAC | R: CGACTCTCC GACGTTGTTA |
| *L. acidipiscis* | F: AGCGGTTCGATGGCTTATAC | R: TCCAAGTCCGACACCAGTCA |
| *L. sanfranciscensis* | F: TGGAACTGATACGCGGATGT | R: GGCCAATTCCTCCAATAACG |
| *L. ruminis* | F: TTGCATTCACCGAAAGAAGC | R: CATAAACATCATGCGGTGTTC |
| *L. agilis* | F: TCGTAGCTTGCTACACCGATTG | R: CATAATGACCATGCGATCATCA |
| *L. delbrueckii* | F: CATGTGCAGACATGCTATCCTT | R: CTCTGAAGTGCCATGTCTCAGT |
| *L. amylophilus* | F: CGAGTTCTGGTTAAGAGTAGCG | R: CGCCATCTTTCAAACATCTATC |
| *L. kunkeei* | F: GAACGAGCTCTCCCAAATTGA | R: GAACCATGCGGTTCCAACTA |
| *L. acetotolerans* | F: GATTACCTTCGGGTATGAAGTT | R: TCATGGATCTCTCCTTTTATCC |
| *L. lindneri* | F: CGGCGTTCTCGAGGACCATA | R: CATCCGGCGTCCTTCATAGC |
| *L. gallinarum* | F: AACTGGCGGTTATCGTAGAC | R: CACAGCAGGAACCATTTTAG |
| *L. amylolyticus* | F: TTCGGTAGTGACGTTTCGGA | R: TCAAGCAAGTGCCATGCAG |

**Supplementary Figures**


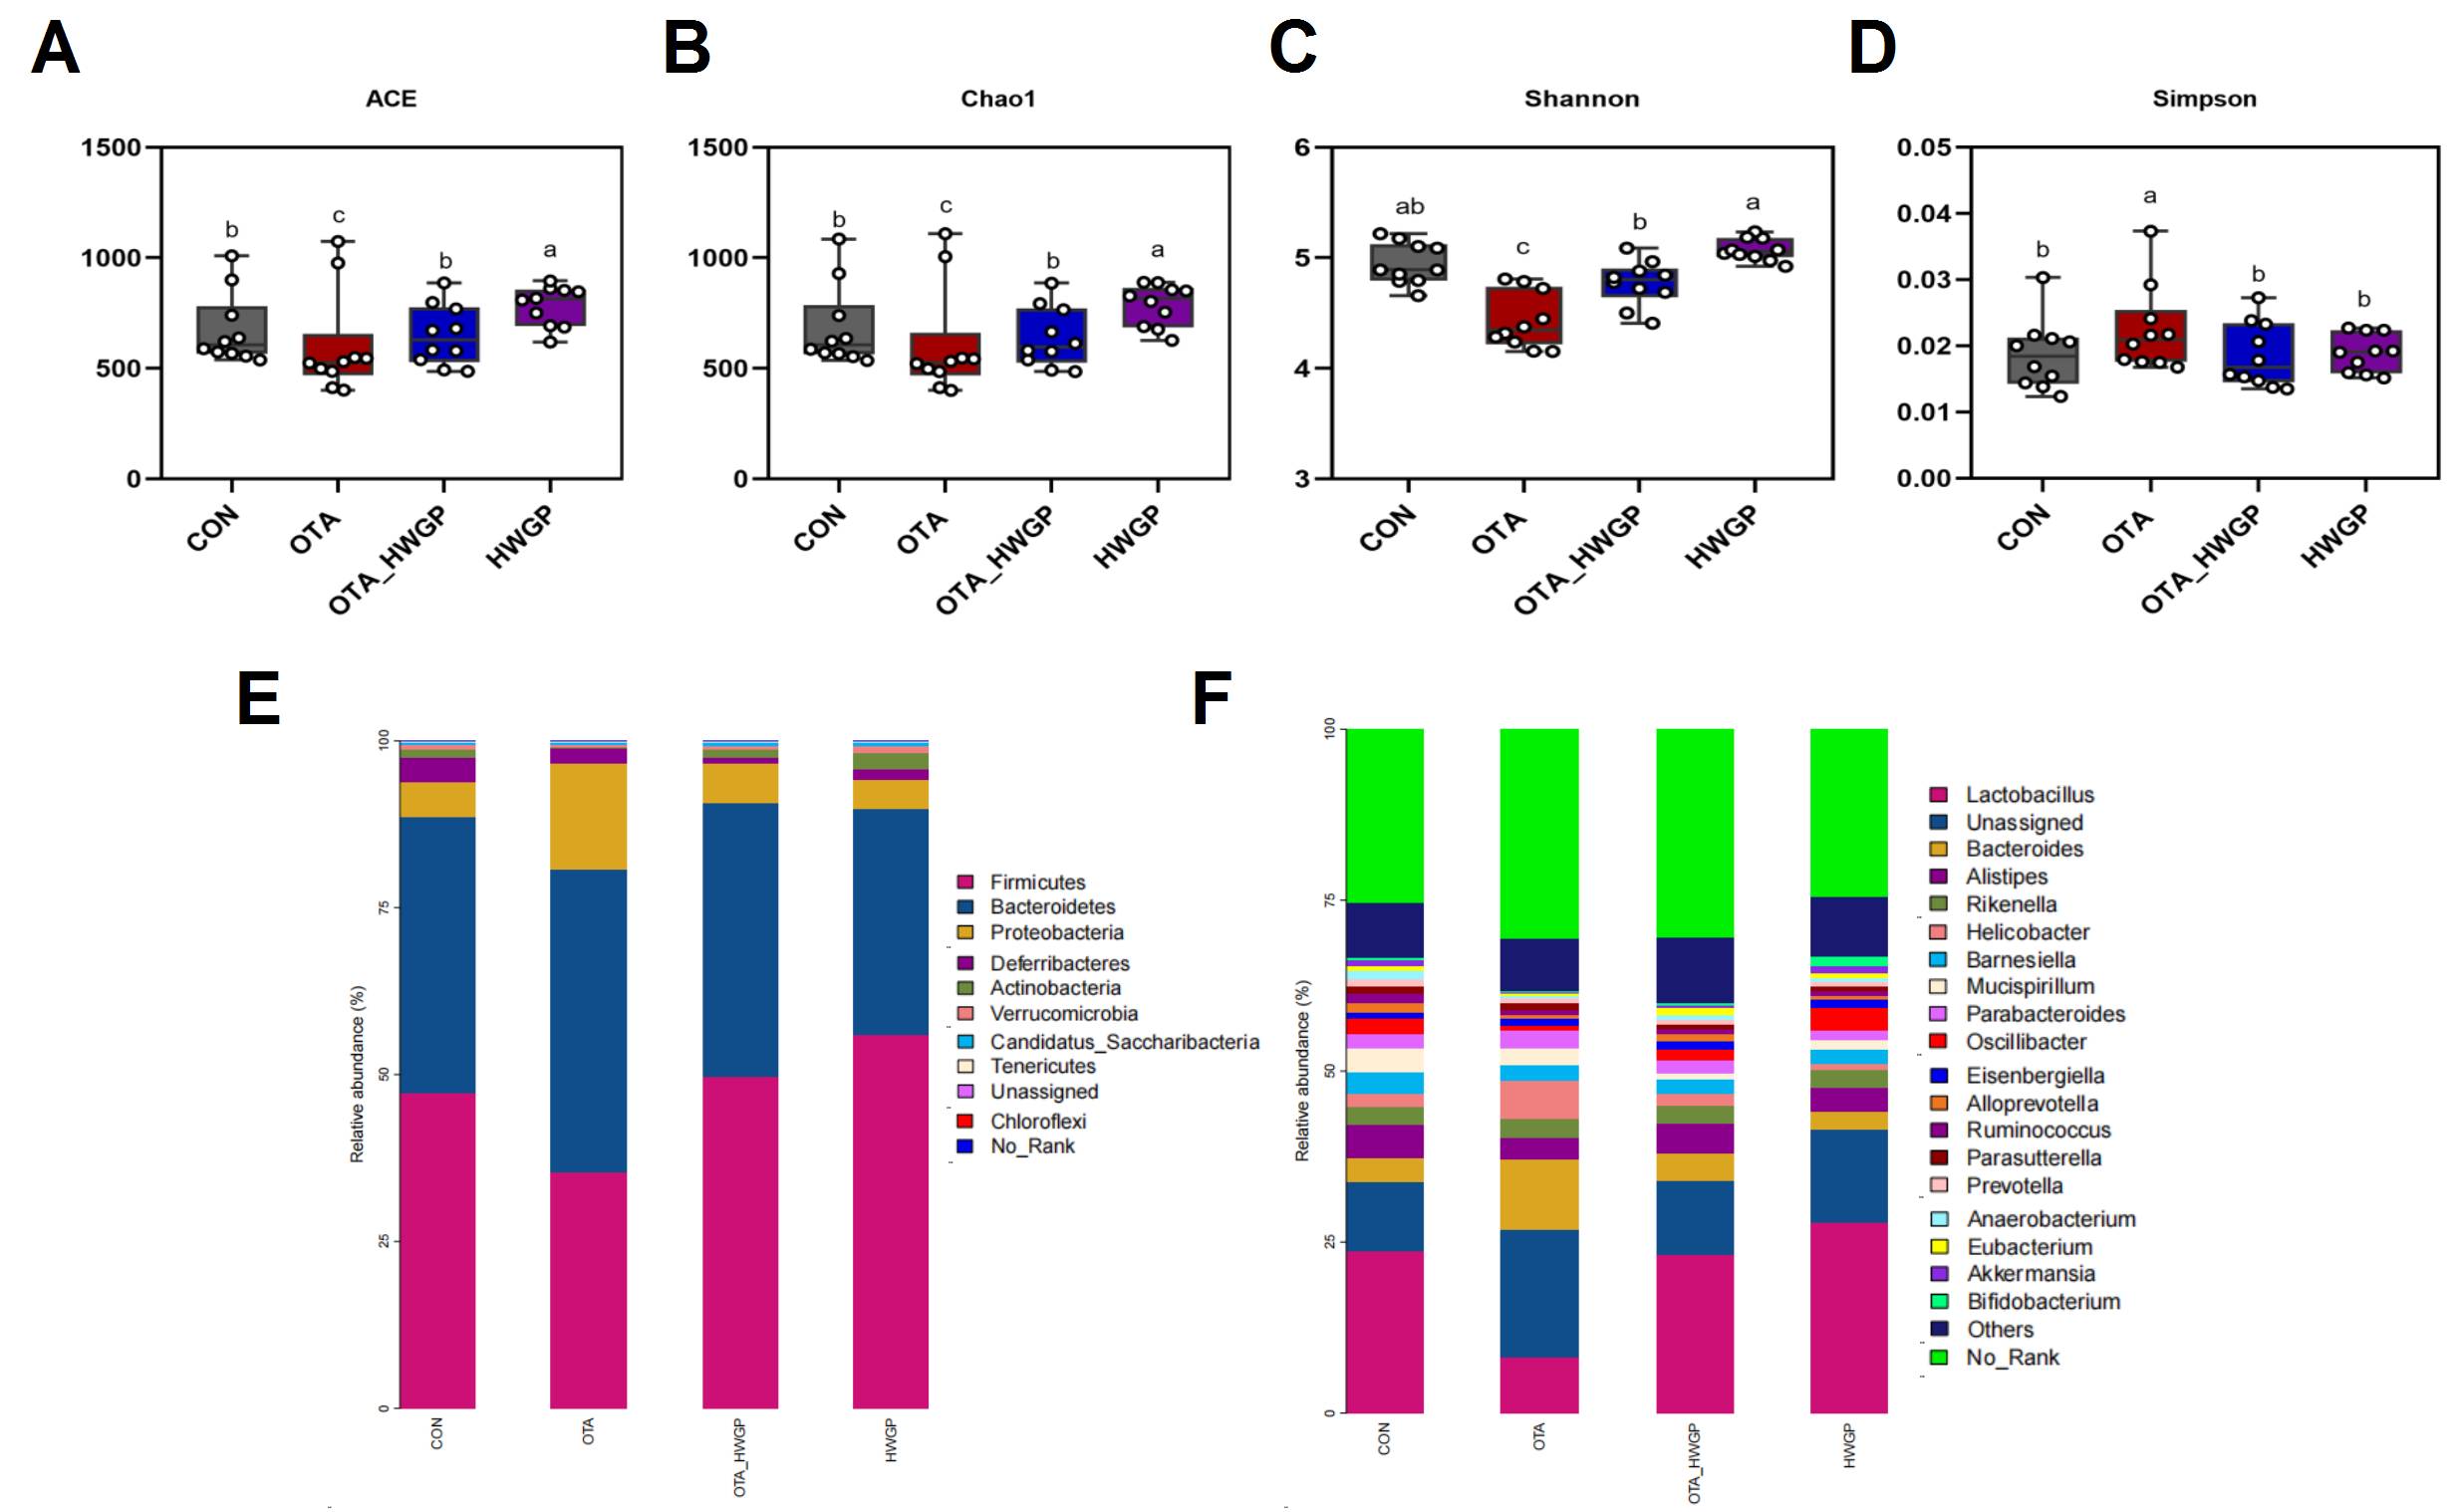


**Fig. S1 Effect of WGP on the composition of gut microbiota in OTA-treated mice**

(A) ACE index; (B) Chao 1 index; (C) Shannon index; (D) Simpson index; (E) Relative abundance of intestinal bacteria at the phylum level; (F) Relative abundance of intestinal bacteria at the genus level. Values with different superscripts are significantly different from each other (*P* < 0.05) (n = 10).


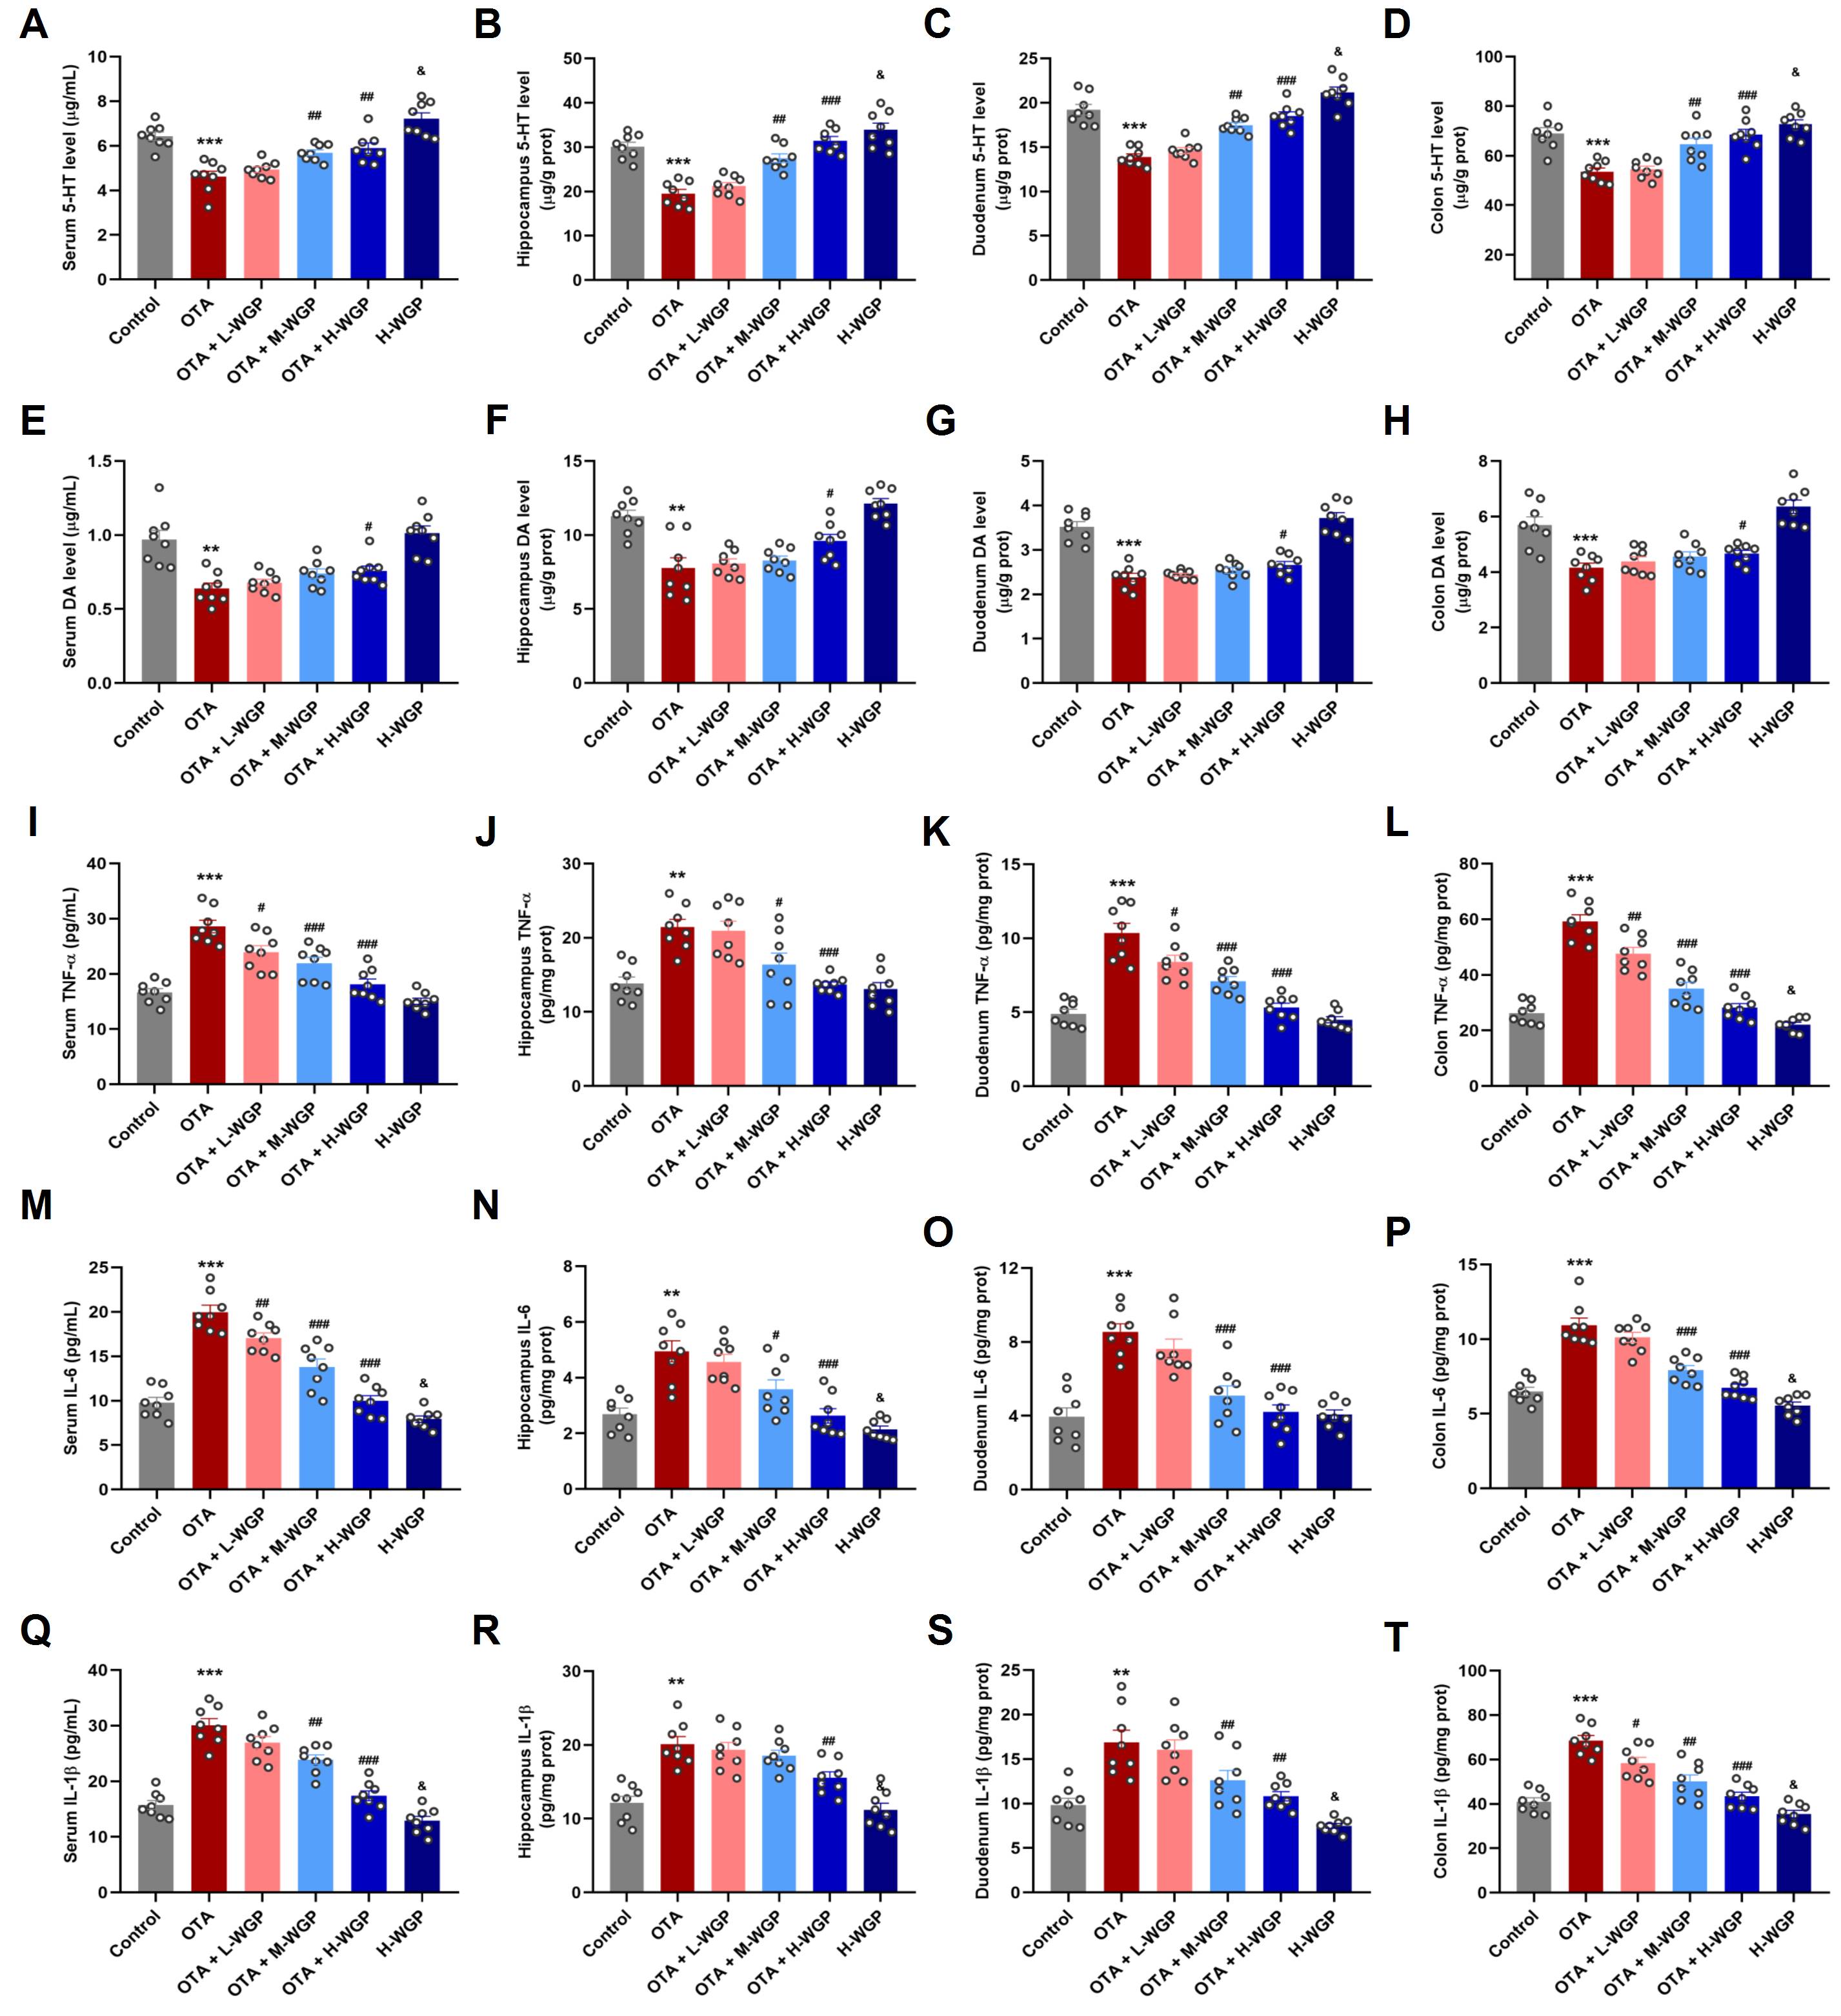


**Fig. S2 Effect of WGP on the levels of inflammatory factors and neurotransmitter levels in serum, hippocampus, duodenum and colon of OTA-treated mice.**

(A-D) 5-HT levels; (E-H) DA levels; (I-L) TNF-α levels; (M-P) IL-6 levels; (Q-T) IL-1β levels. Values are mean ± SE; **P* < 0.05, ***P* < 0.01, ****P* < 0.001, compared with Control group, **#***P* < 0.05, **##***P* < 0.01, **###***P* < 0.001, compared with OTA group, **$***P* < 0.05, compared with Control group.


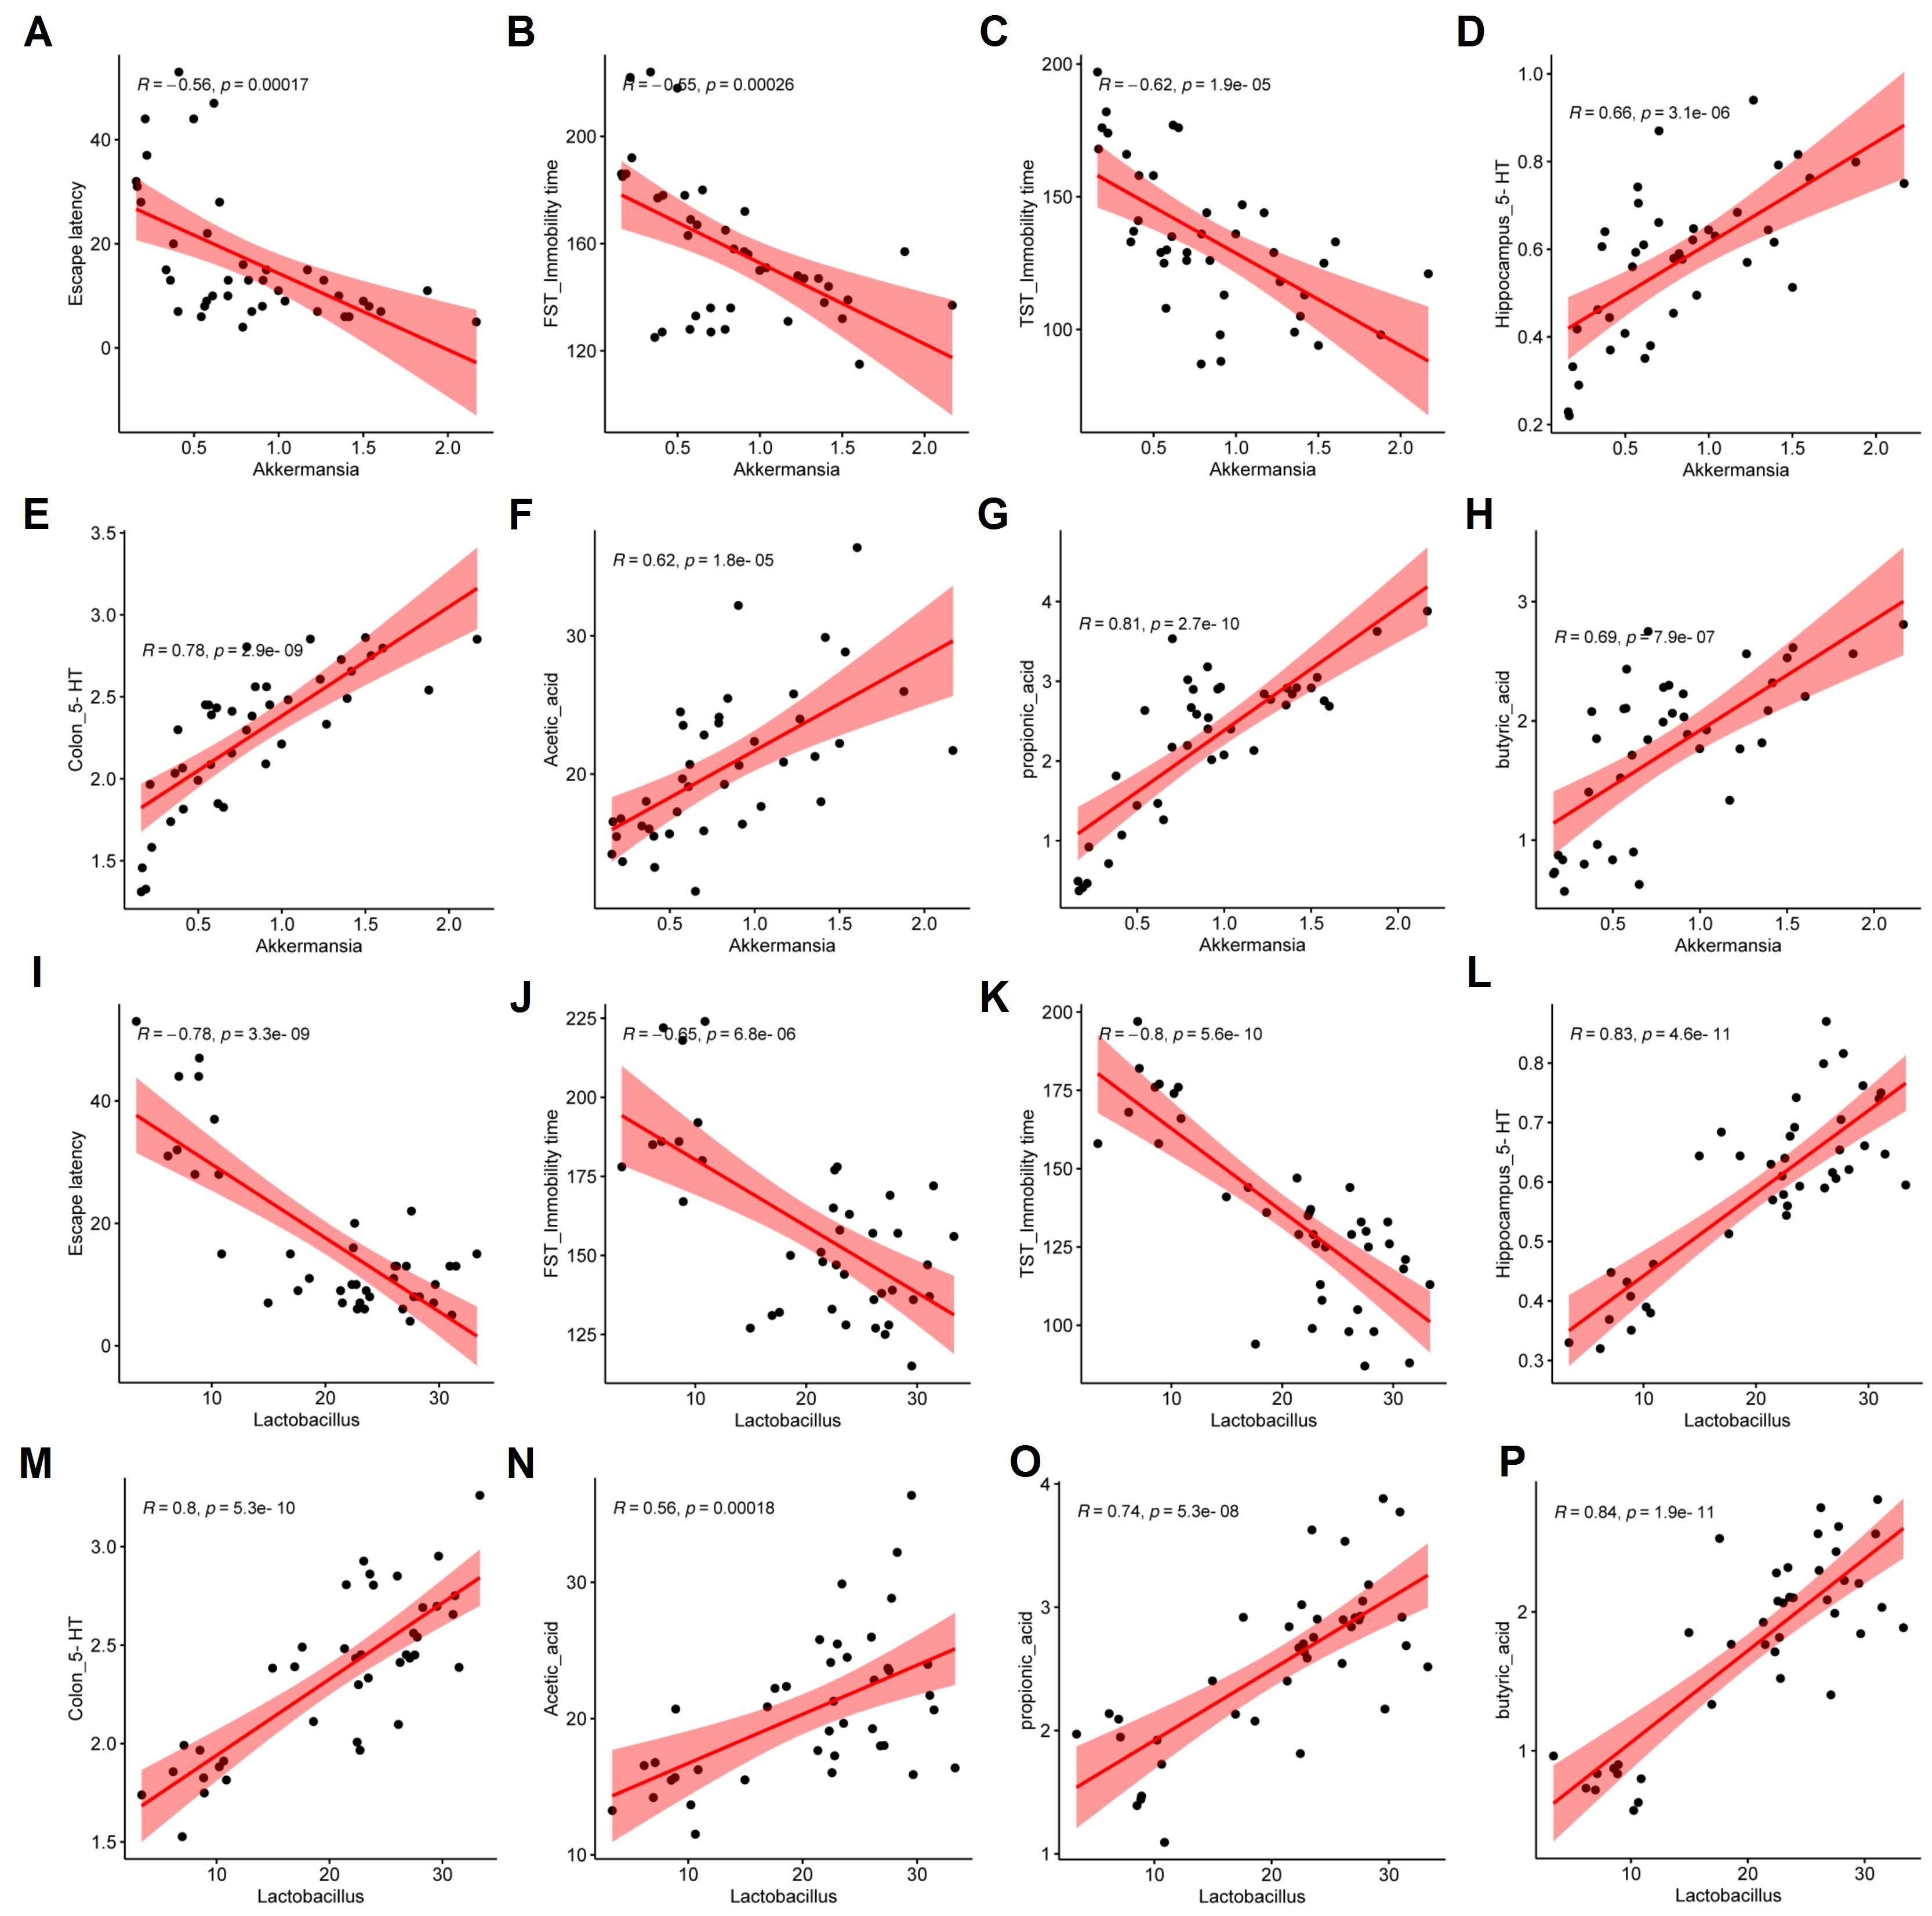


**Fig. S3 Correlation between the *Akkermansia muciniphila*,** ***Lactobacillus* and phenotypic variables.**

(A) Plots of correlation analysis of *Akkermansia muciniphila* and escape latency, immobility time in FST, immobility time in TST, 5-HT levels in hippocampus, 5-HT levels in colon, acetic acid level, propionic acid level and butyric acid level; (B) Plots of correlation analysis of *Lactobacillus* and escape latency, immobility time in FST, immobility time in TST, 5-HT levels in hippocampus, 5-HT levels in colon, acetic acid level, propionic acid level and butyric acid level.


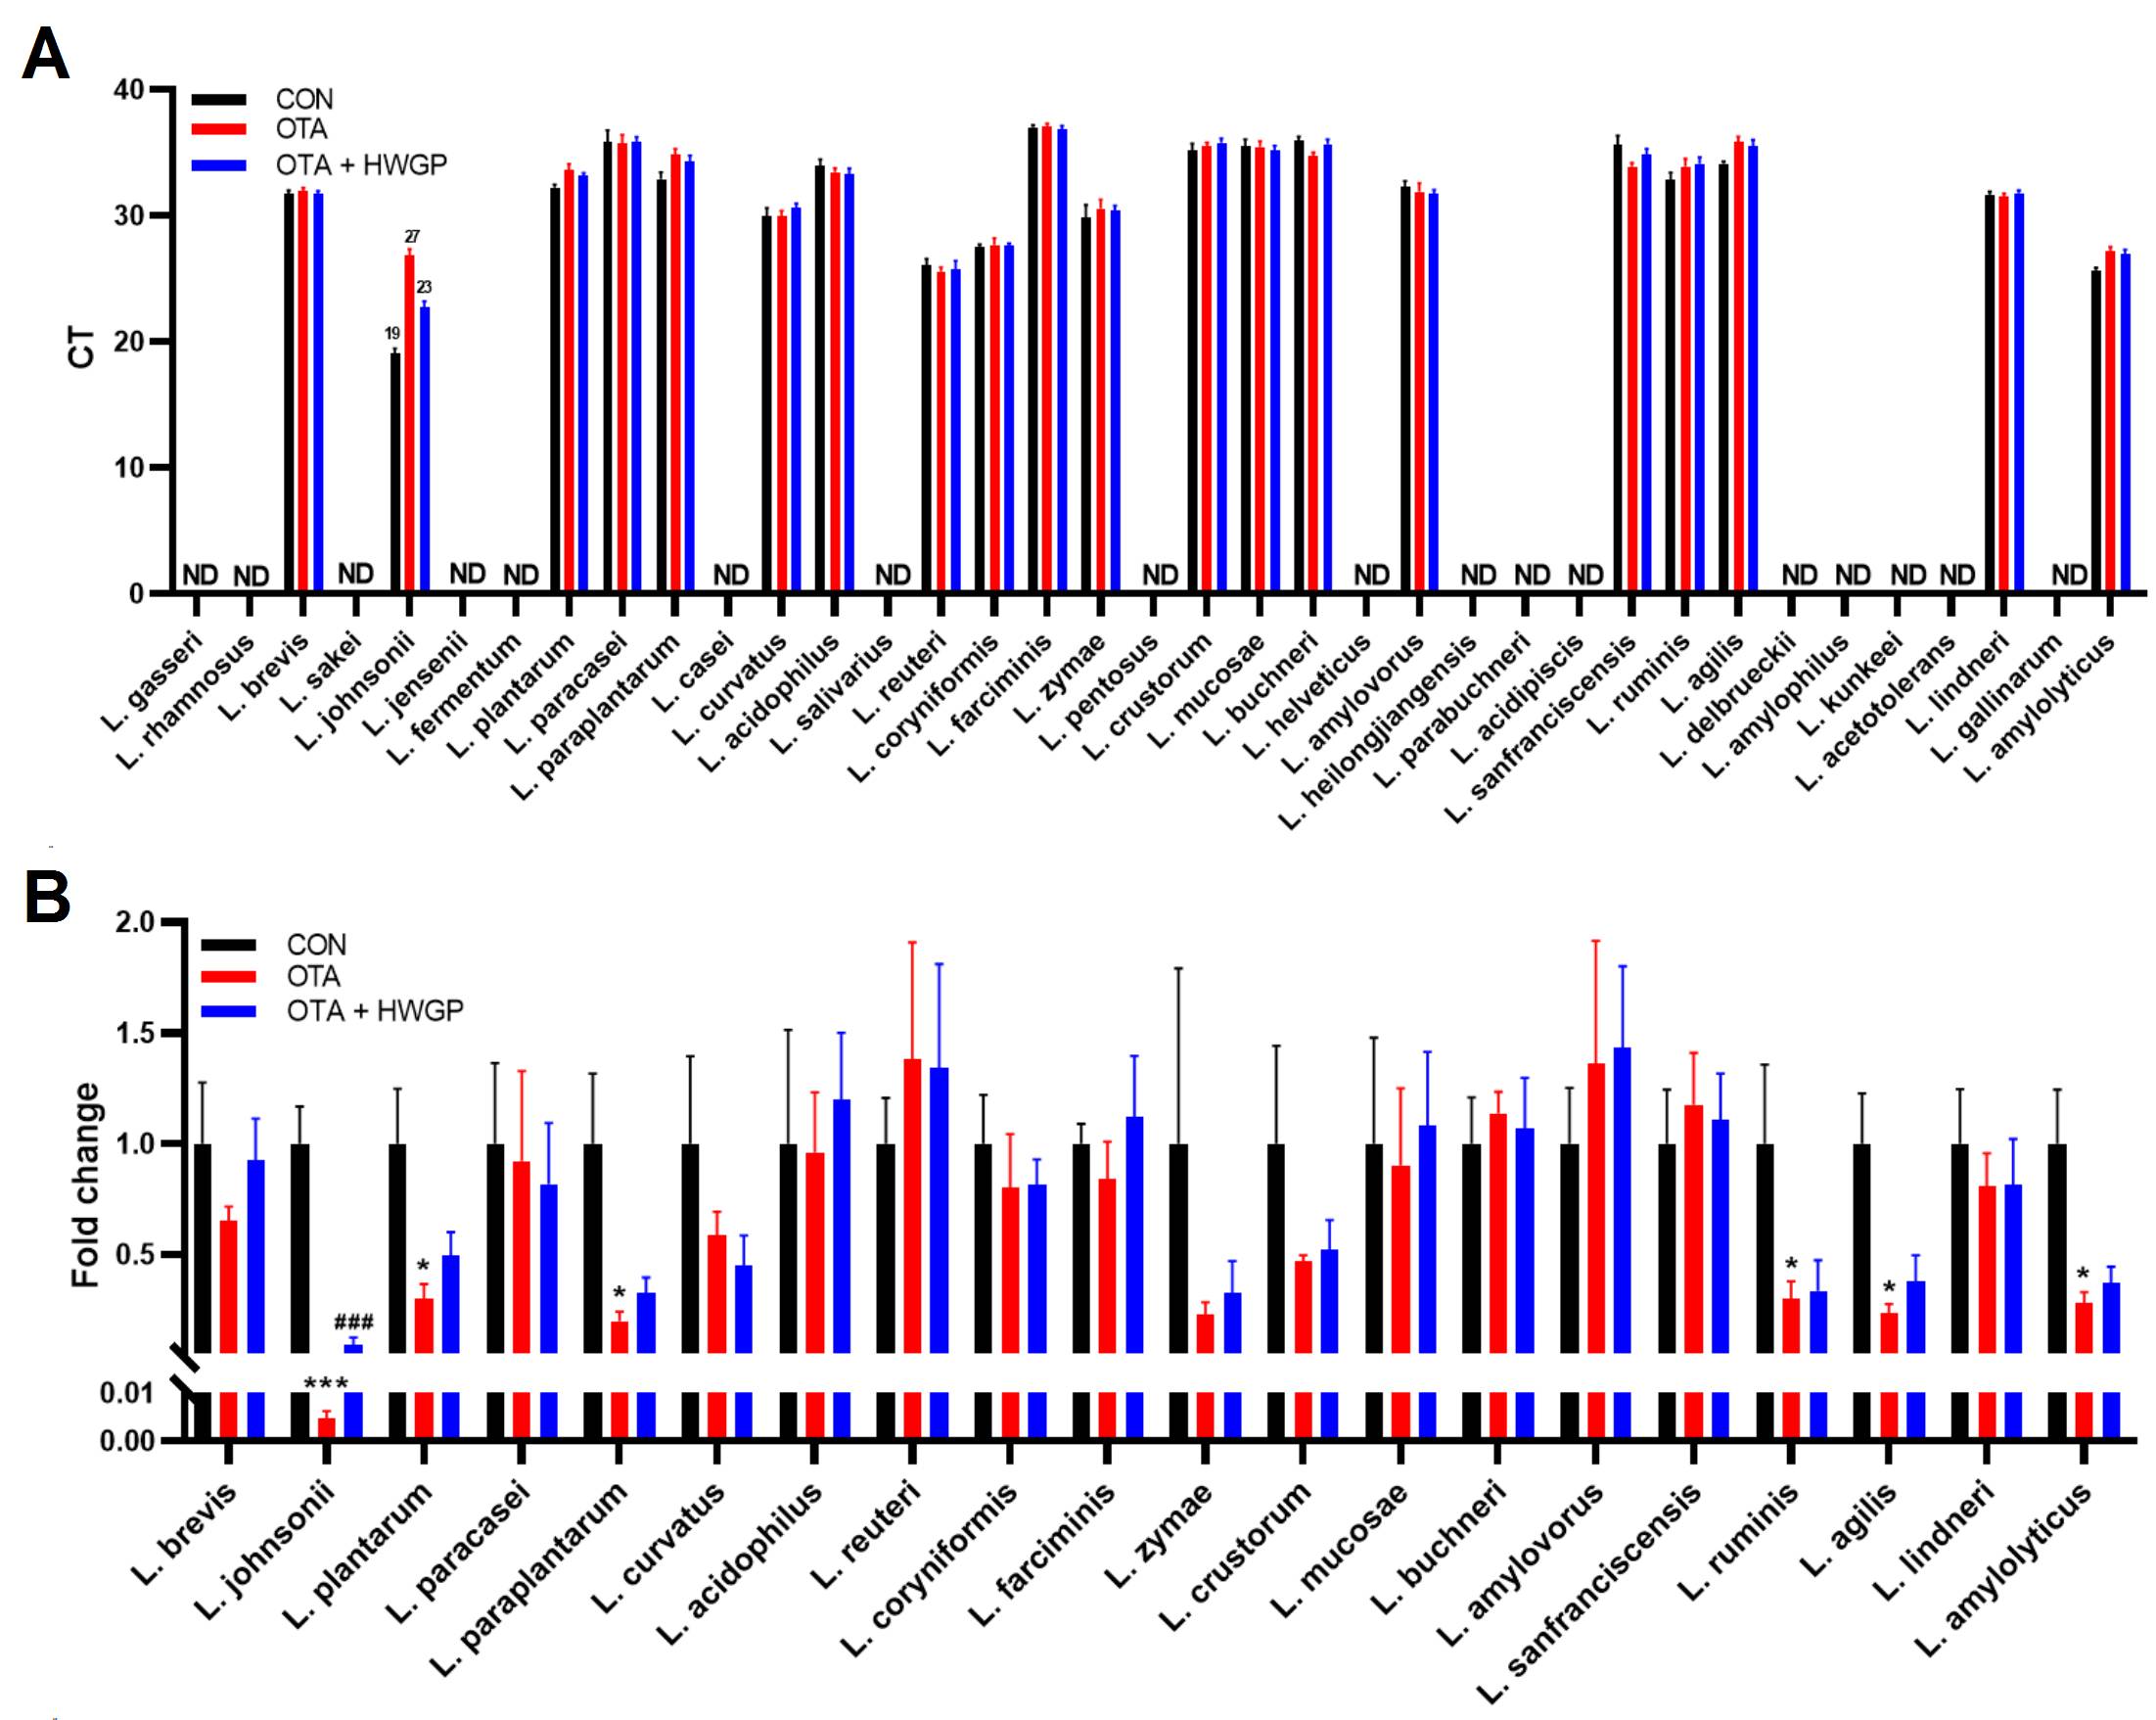


**Fig. S4 The mRNA expression of 37 species levels of Lactobacillus**


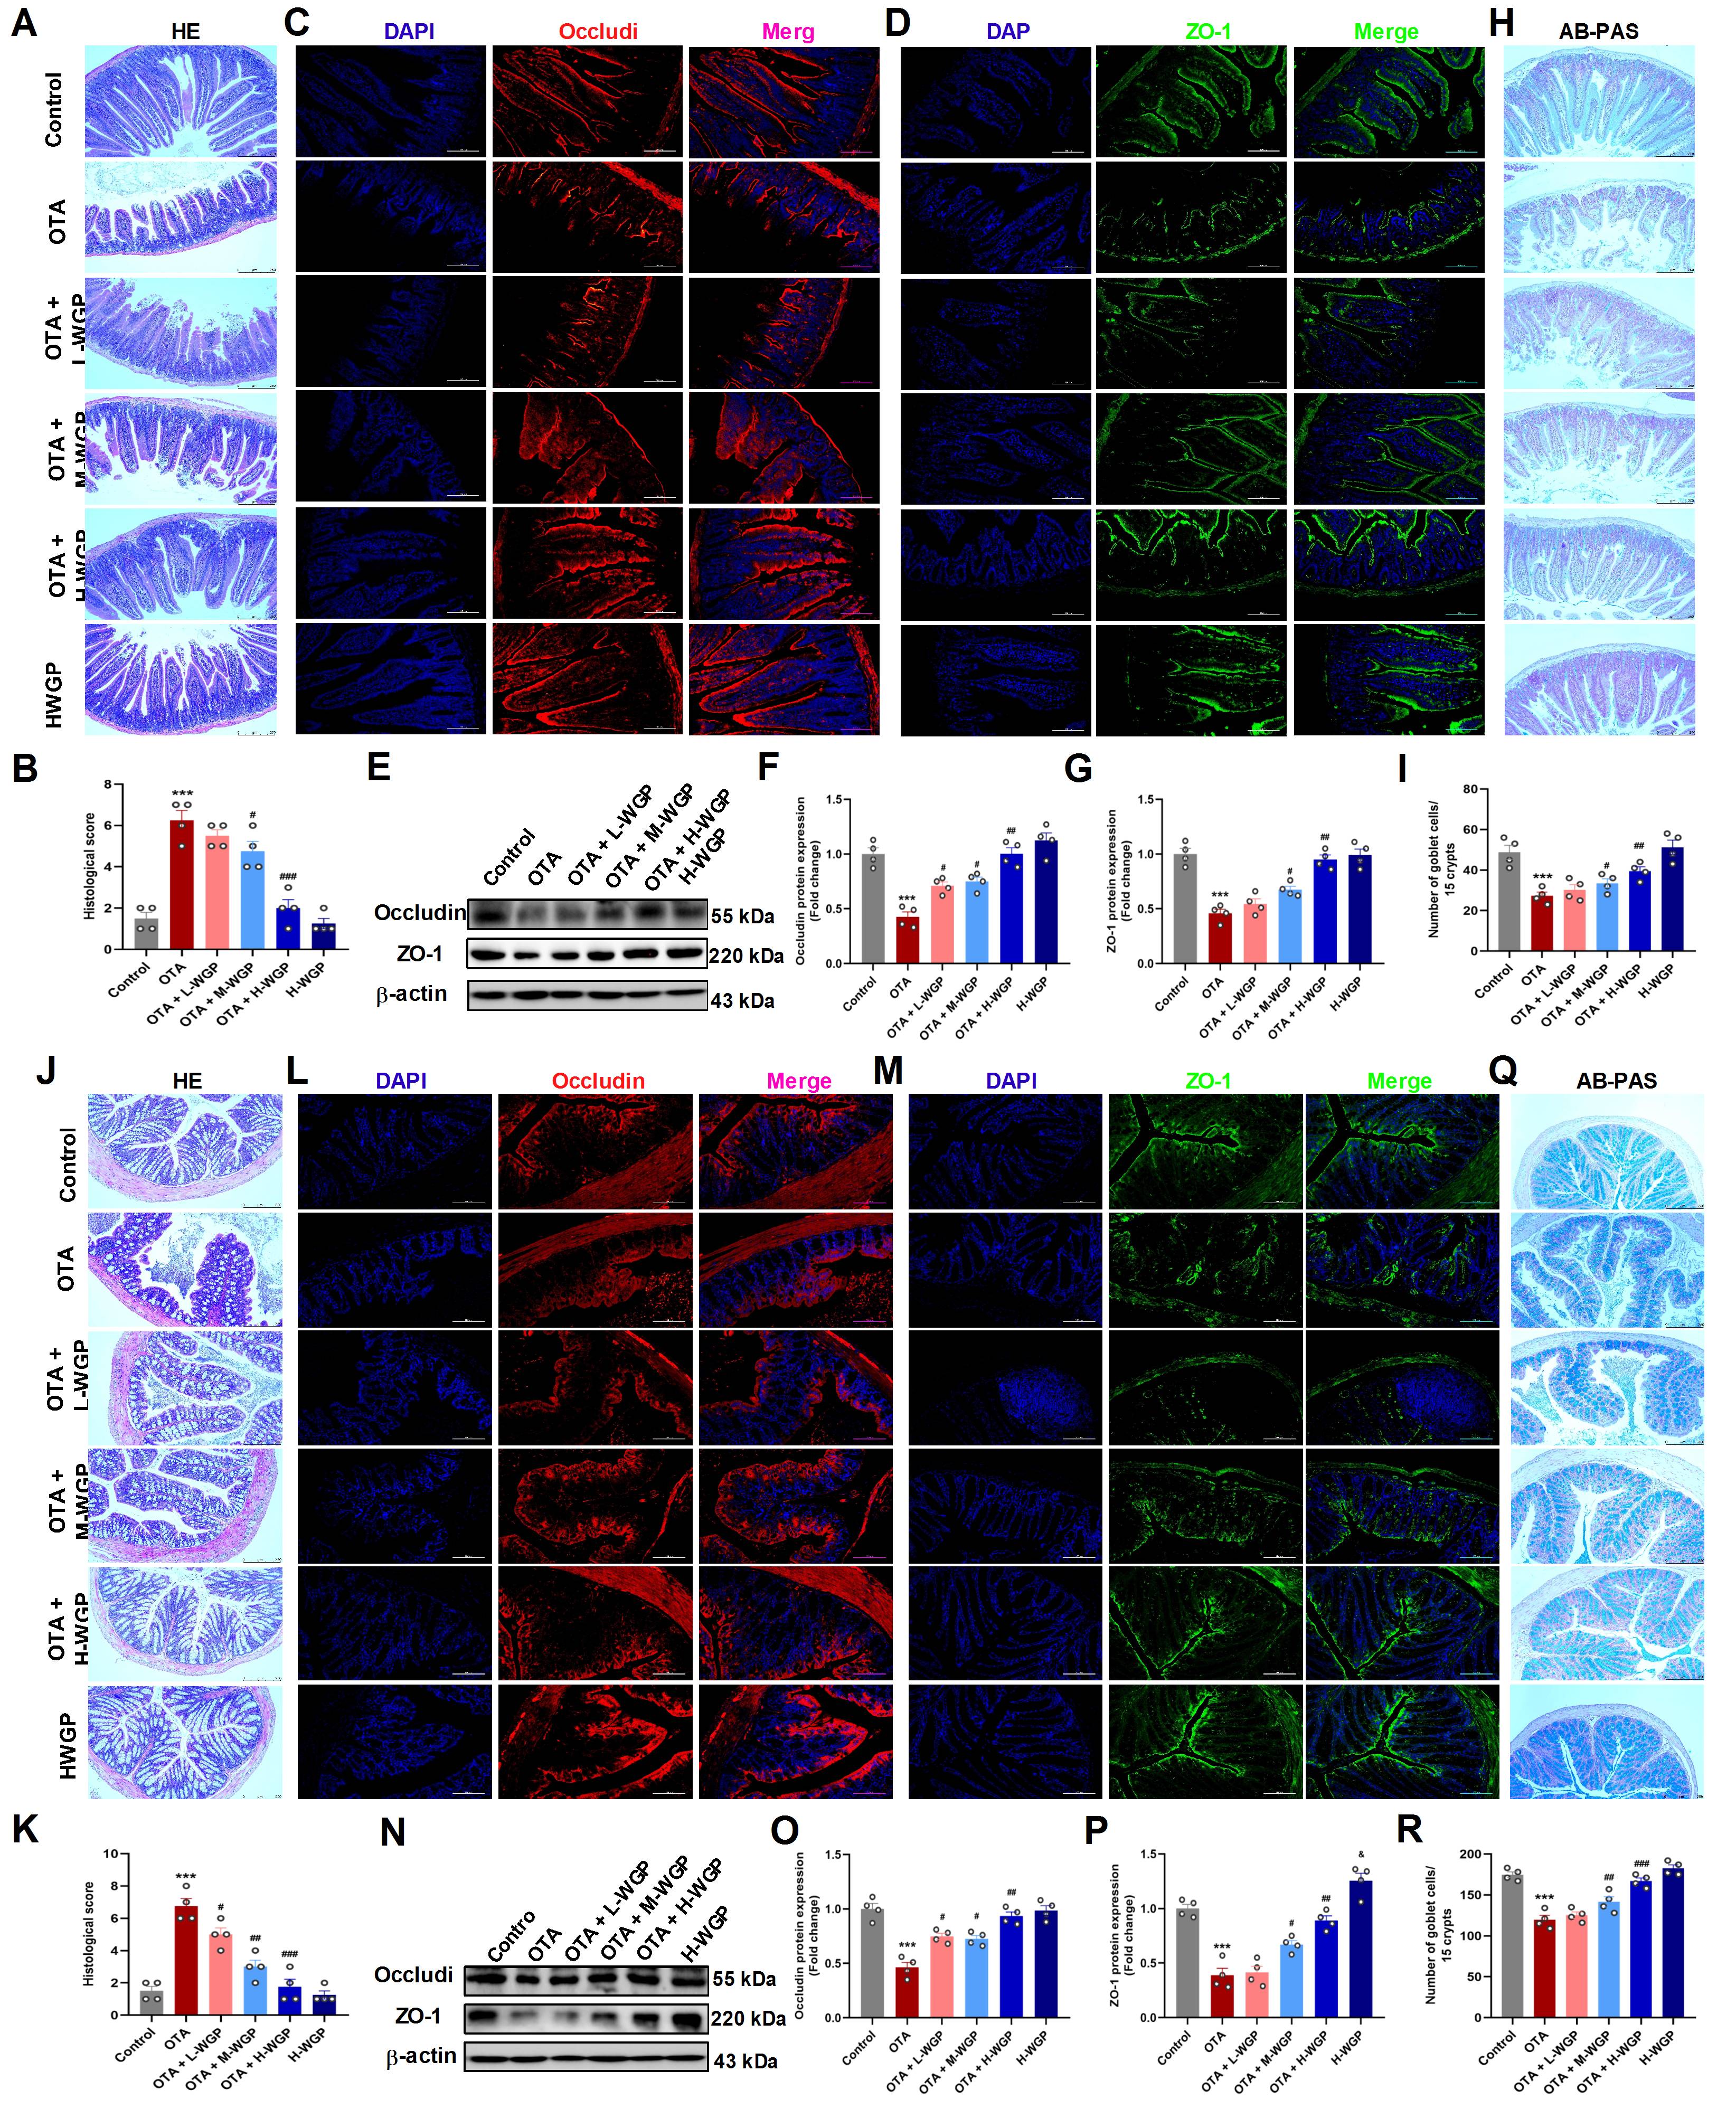


**Fig. S5 Effect of WGP on intestinal morphology, tight junction protein and number of goblets in** **duodenum and colon of OTA-treated mice.**

(A) HE staining in duodenum; (B) Histological score in duodenum; (C) Immunofluorescent staining of Occludin protein in duodenum; (D) Immunofluorescent staining of ZO-1 protein in duodenum; (E-G) Occludin and ZO-1 protein expression in duodenum; (H) AB-PAS staining in duodenum; (I) Number of goblets in duodenum; (J) HE staining in colon; (K) Histological score in colon; (L) Immunofluorescent staining of Occludin protein in colon; (M) Immunofluorescent staining of ZO-1 protein in colon; (N-P) Occludin and ZO-1 protein expression in colon; (Q) AB-PAS staining in colon; (R) Number of goblets in colon. Values are mean ± SE; **P* < 0.05, ***P* < 0.01, ****P* < 0.001, compared with Control group, **#***P* < 0.05, **##***P* < 0.01, **###***P* < 0.001, compared with OTA group, **$***P* < 0.05, compared with Control group.


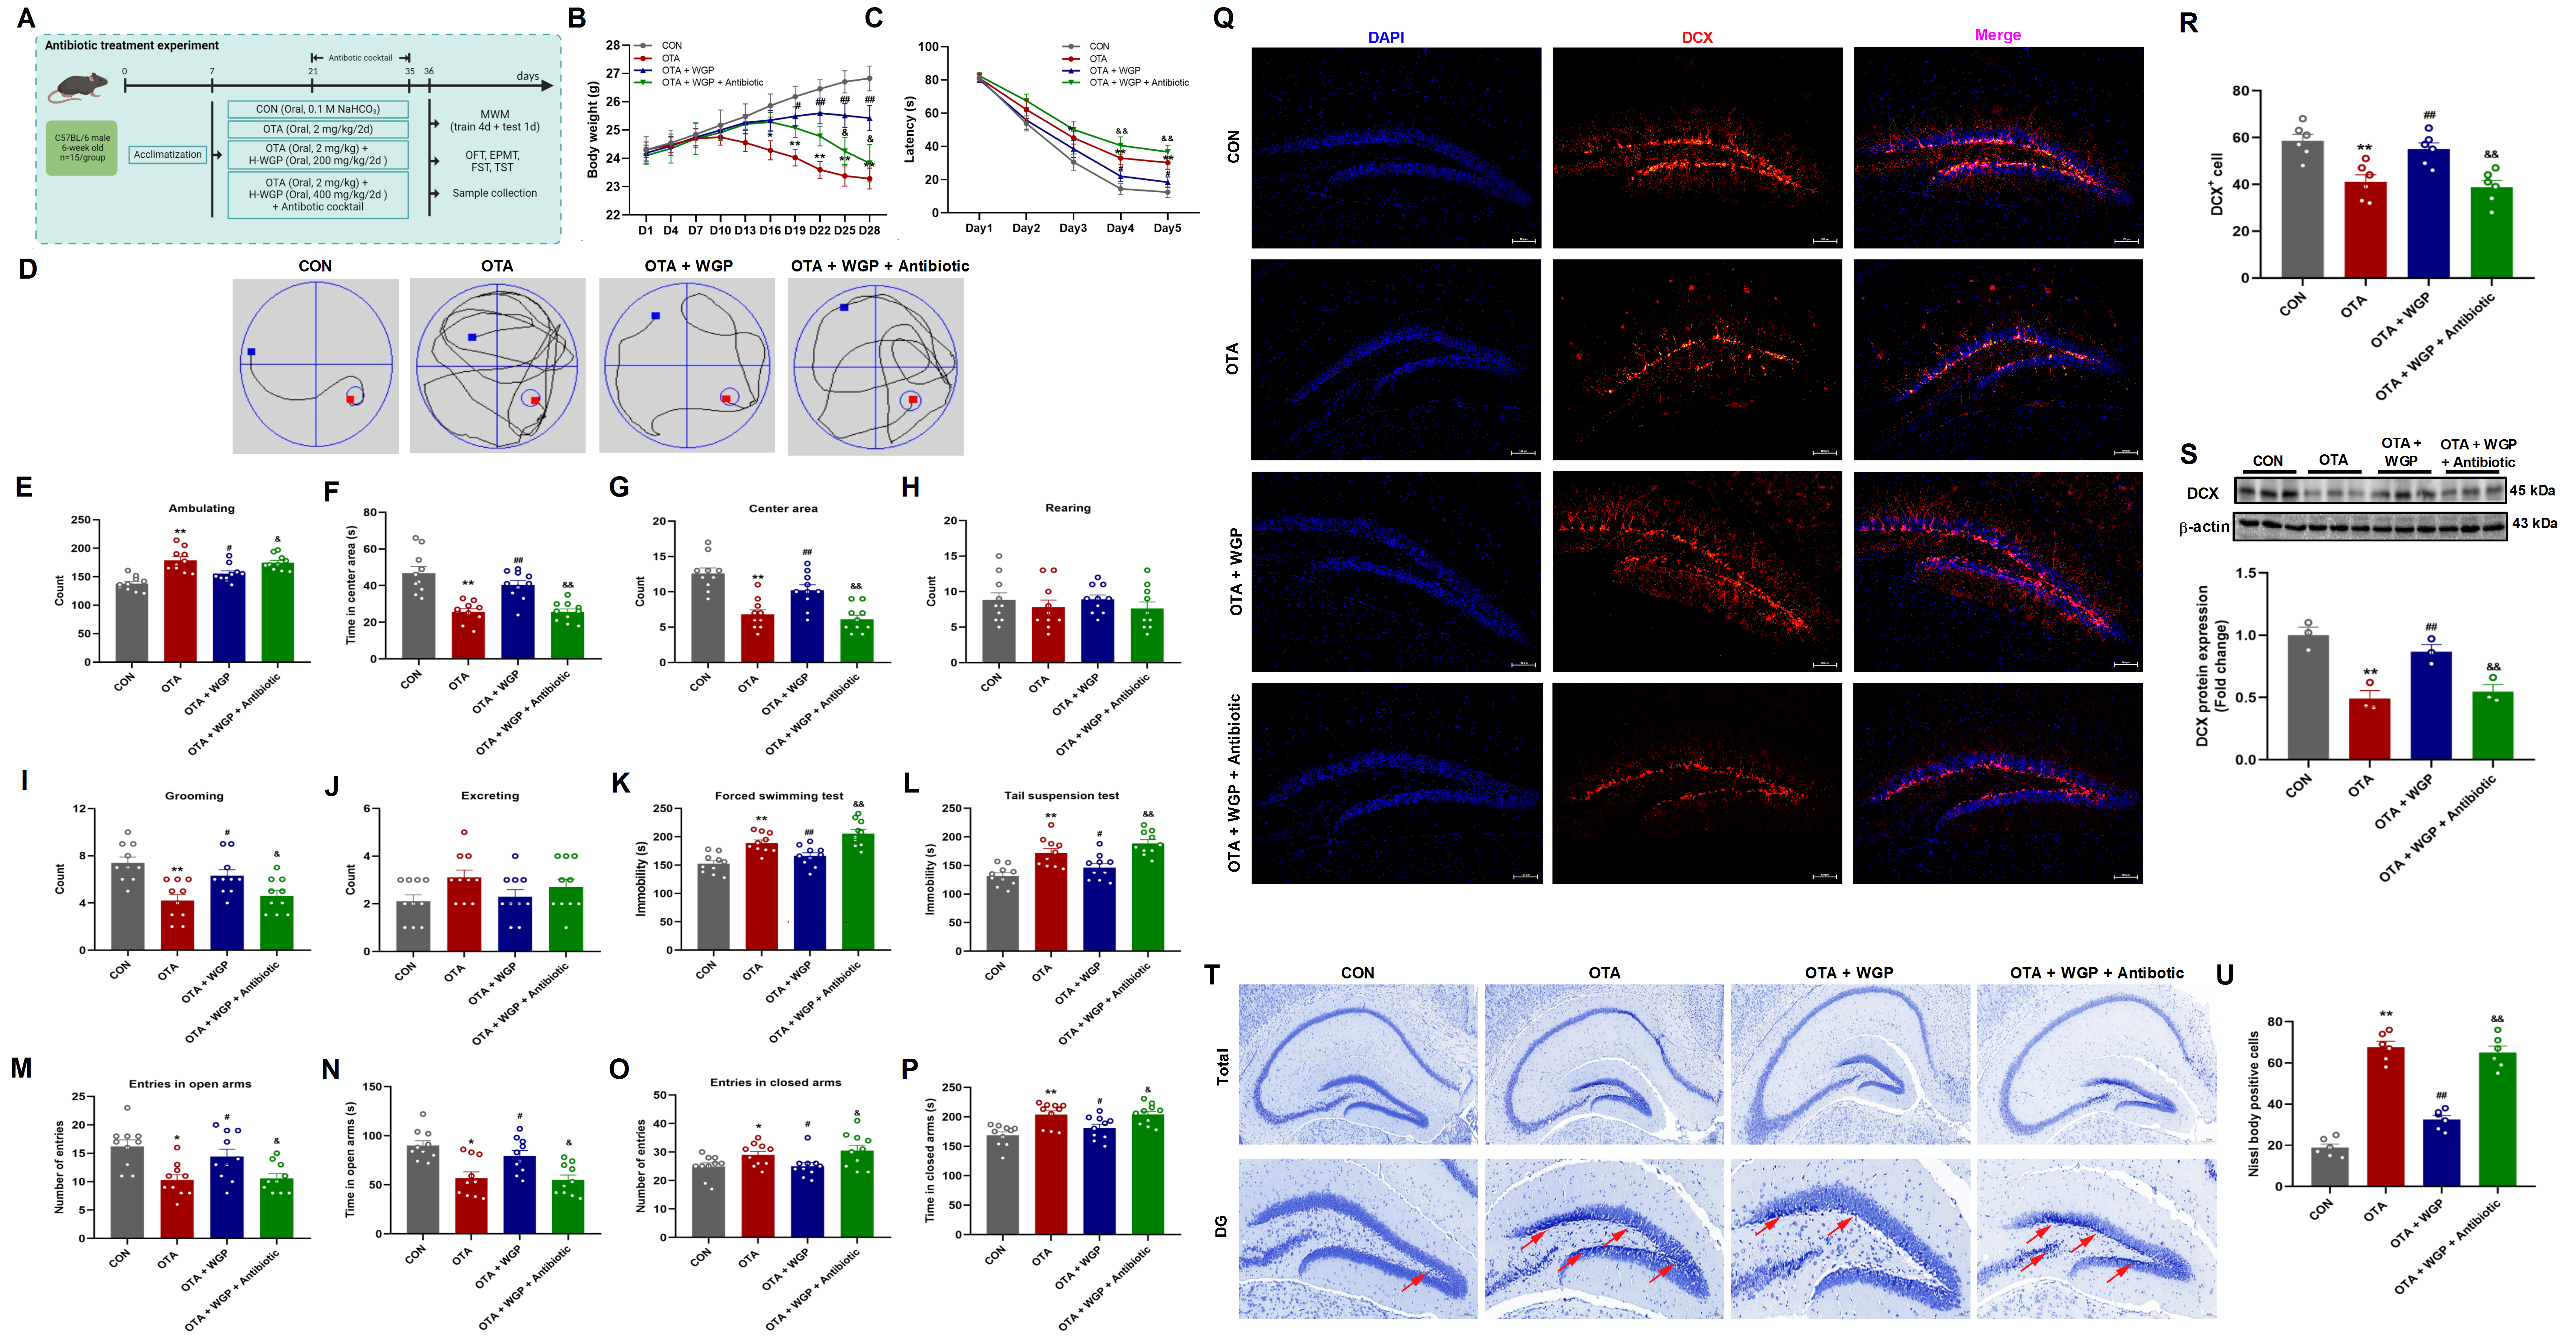


Fig. S6 The gut microbiota mediated the neuroprotective effect of WGP in cognitive impairment induced by OTA.

1. Schematic illustration of experimental design; (B) Body weight (n = 10); (C) Latency to reach the platform (n = 10); (D) Typical swimming routes in the MWM test (n = 10); (E-J) The counts of ambulating, time spent in center area, center area entry, rearing, grooming, and excreting in the open field test (n = 10); (K) The immobility time in the forced swimming test (n = 10); (L) The immobility time in the tail suspension test (n = 10); (M, O) The number of entries in open and closed arms in the elevated plus maze test (n = 12); (N, P) The time spent in open and closed arms of the elevated plus maze (n = 12); (Q) Immunofluorescent staining of DCX in dentate gyrus (DG) region (n = 3), The immunofluorescent results were processed using Image J. Bar = 100 μm.; (R) DCX+ cells (n = 3); (S) Content of DCX protein (n = 4); (T) Nissl staining of hippocampus (n = 3), Bar = 50 or 100 μm; (U) Nissl body positive cells in the hippocampal DG regions (n=3). The data represent the mean ± SEM, *P* < 0.05 was set as the threshold for significance by one-way ANOVA followed by post hoc comparisons using Tukey’s test for multiple groups’ comparisons, **P* < 0.05, ***P* < 0.01, compared with Control group; **#***P* < 0.05, **##***P* < 0.01, compared with OTA group; &*P* < 0.05, &&*P* < 0.01, compared with OTA + WGP group.


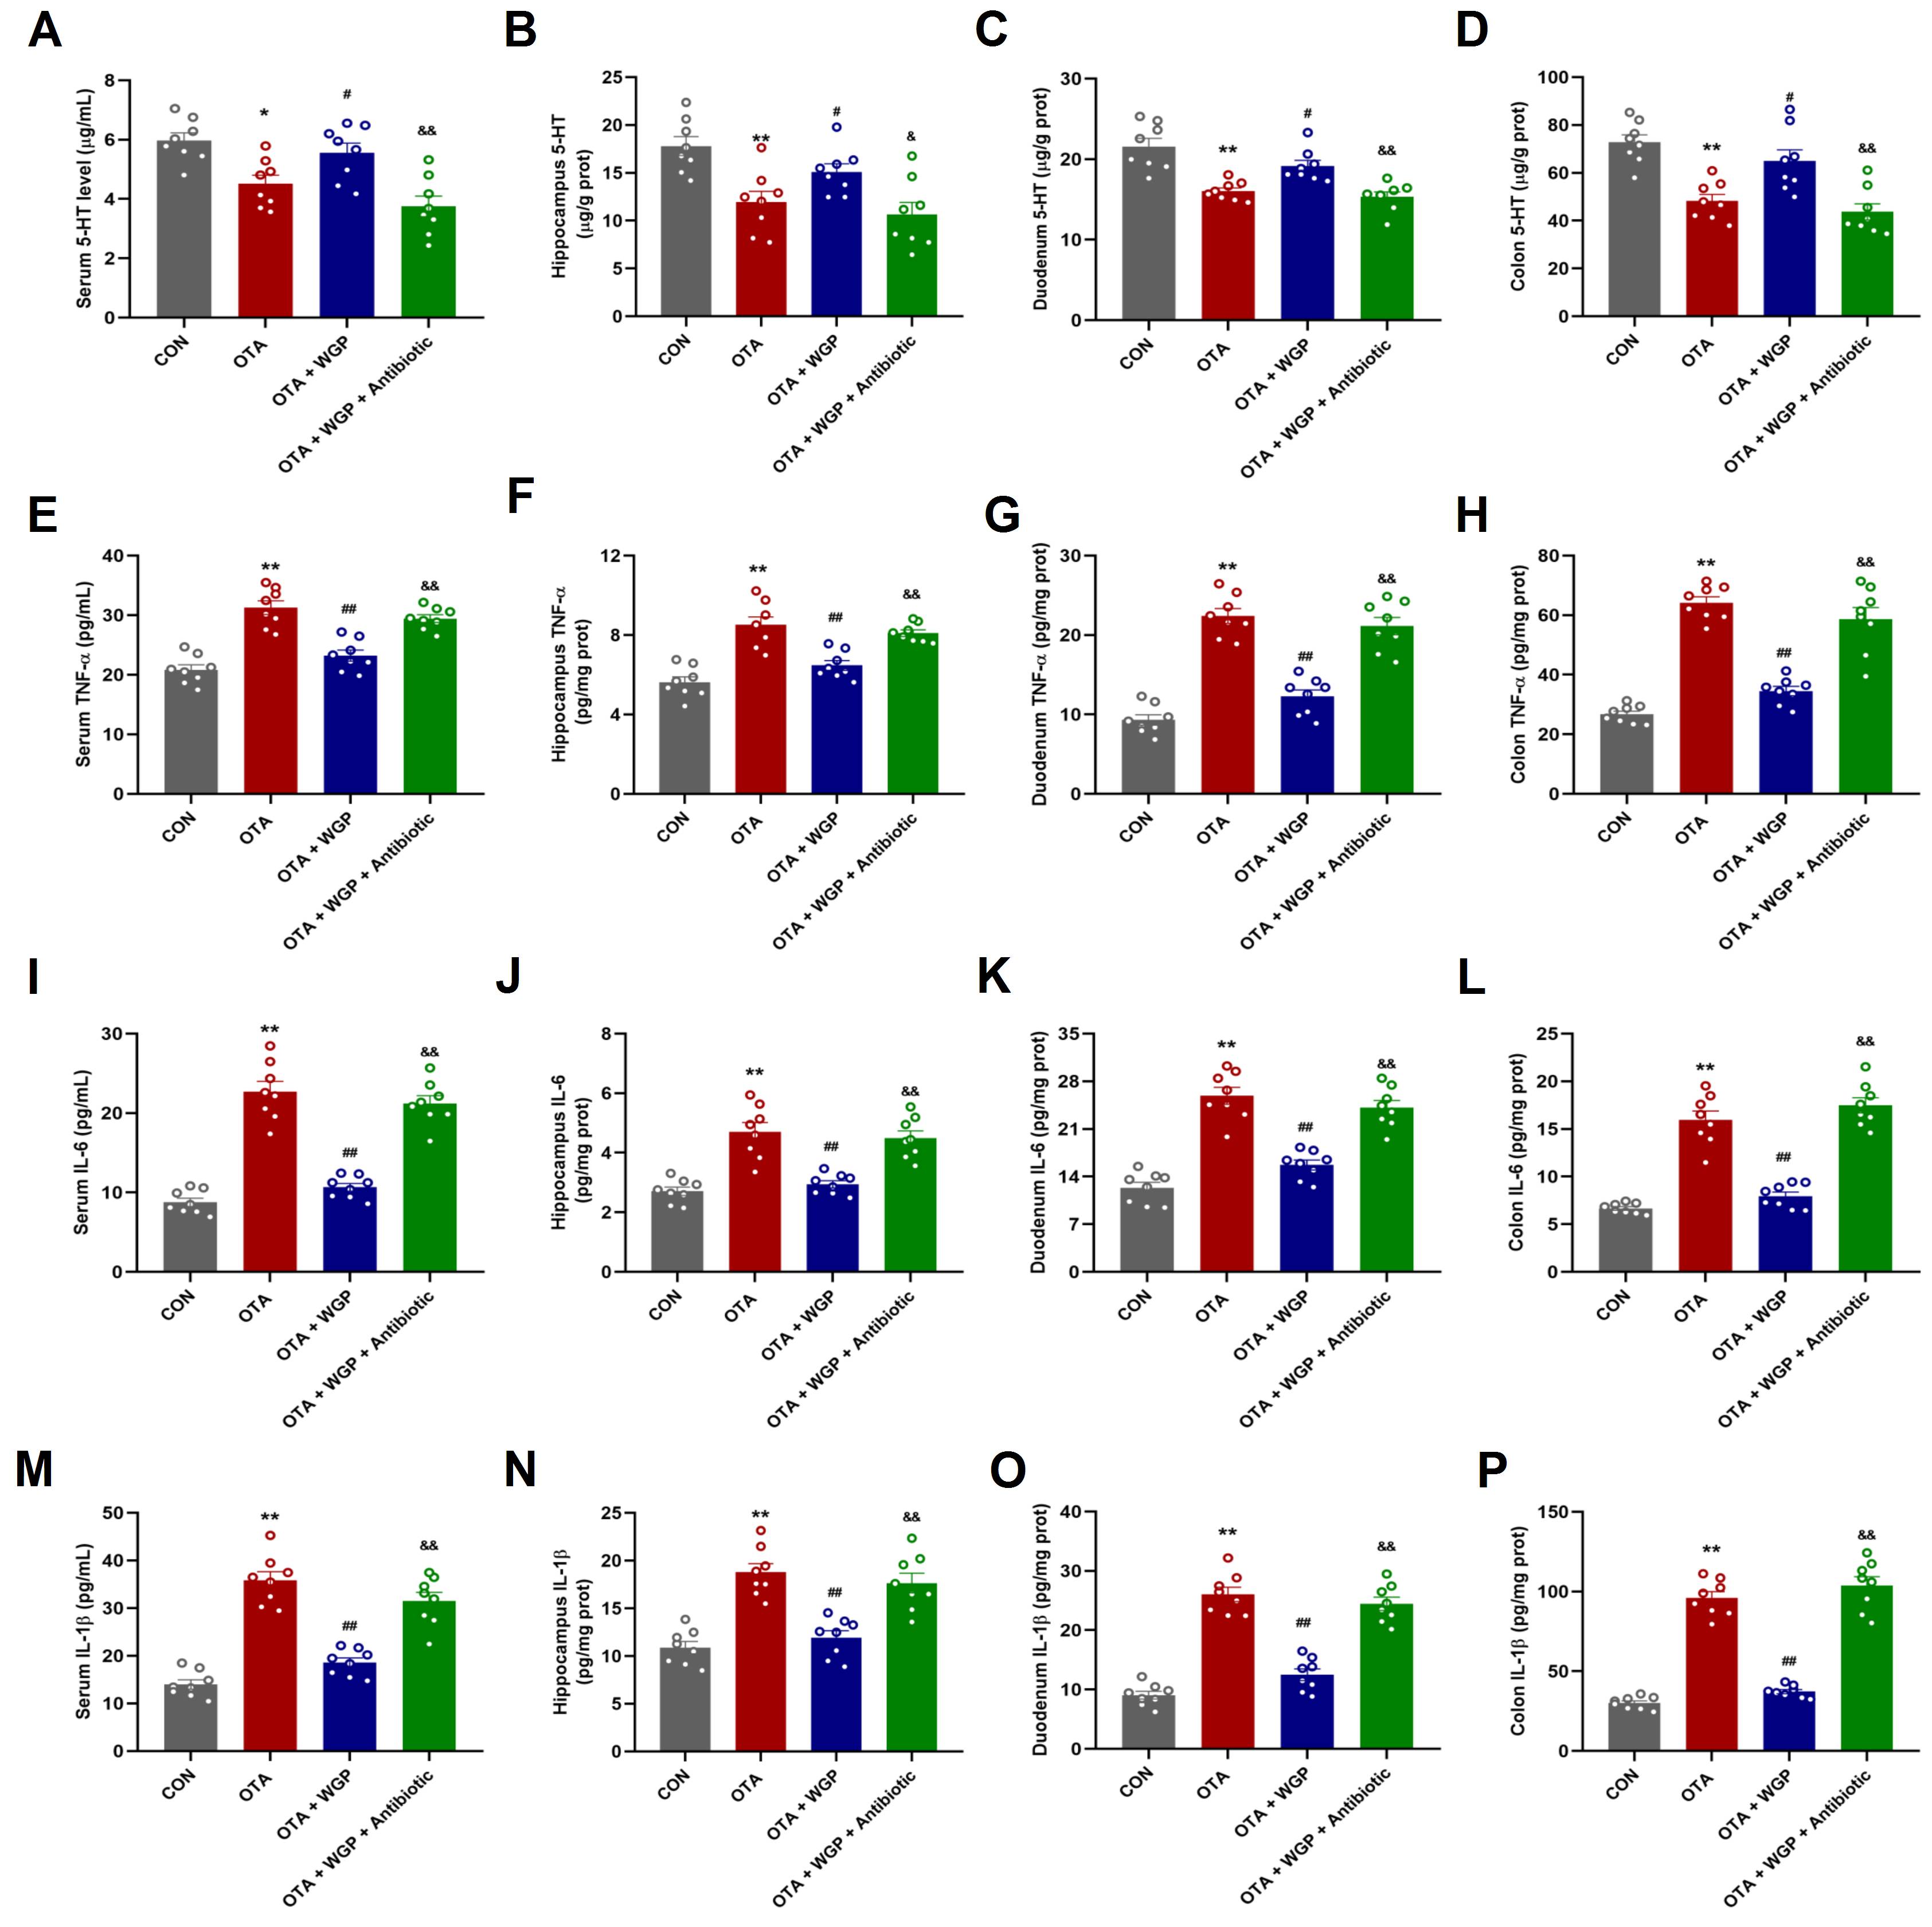


**Fig. S7 Effect of WGP on the levels of inflammatory factors and neurotransmitter levels in serum, hippocampus, duodenum and colon of OTA-treated mice.**

(A-D) 5-HT levels; (E-H) TNF-α levels; (I-L) IL-6 levels; (M-P) IL-1β levels. Values are mean ± SE; **P* < 0.05, ***P* < 0.01, compared with CON group, **#***P* < 0.05, **##***P* < 0.01,compared with OTA group, **&***P* < 0.05, **&&***P* < 0.01, compared with OTA+WGP group.


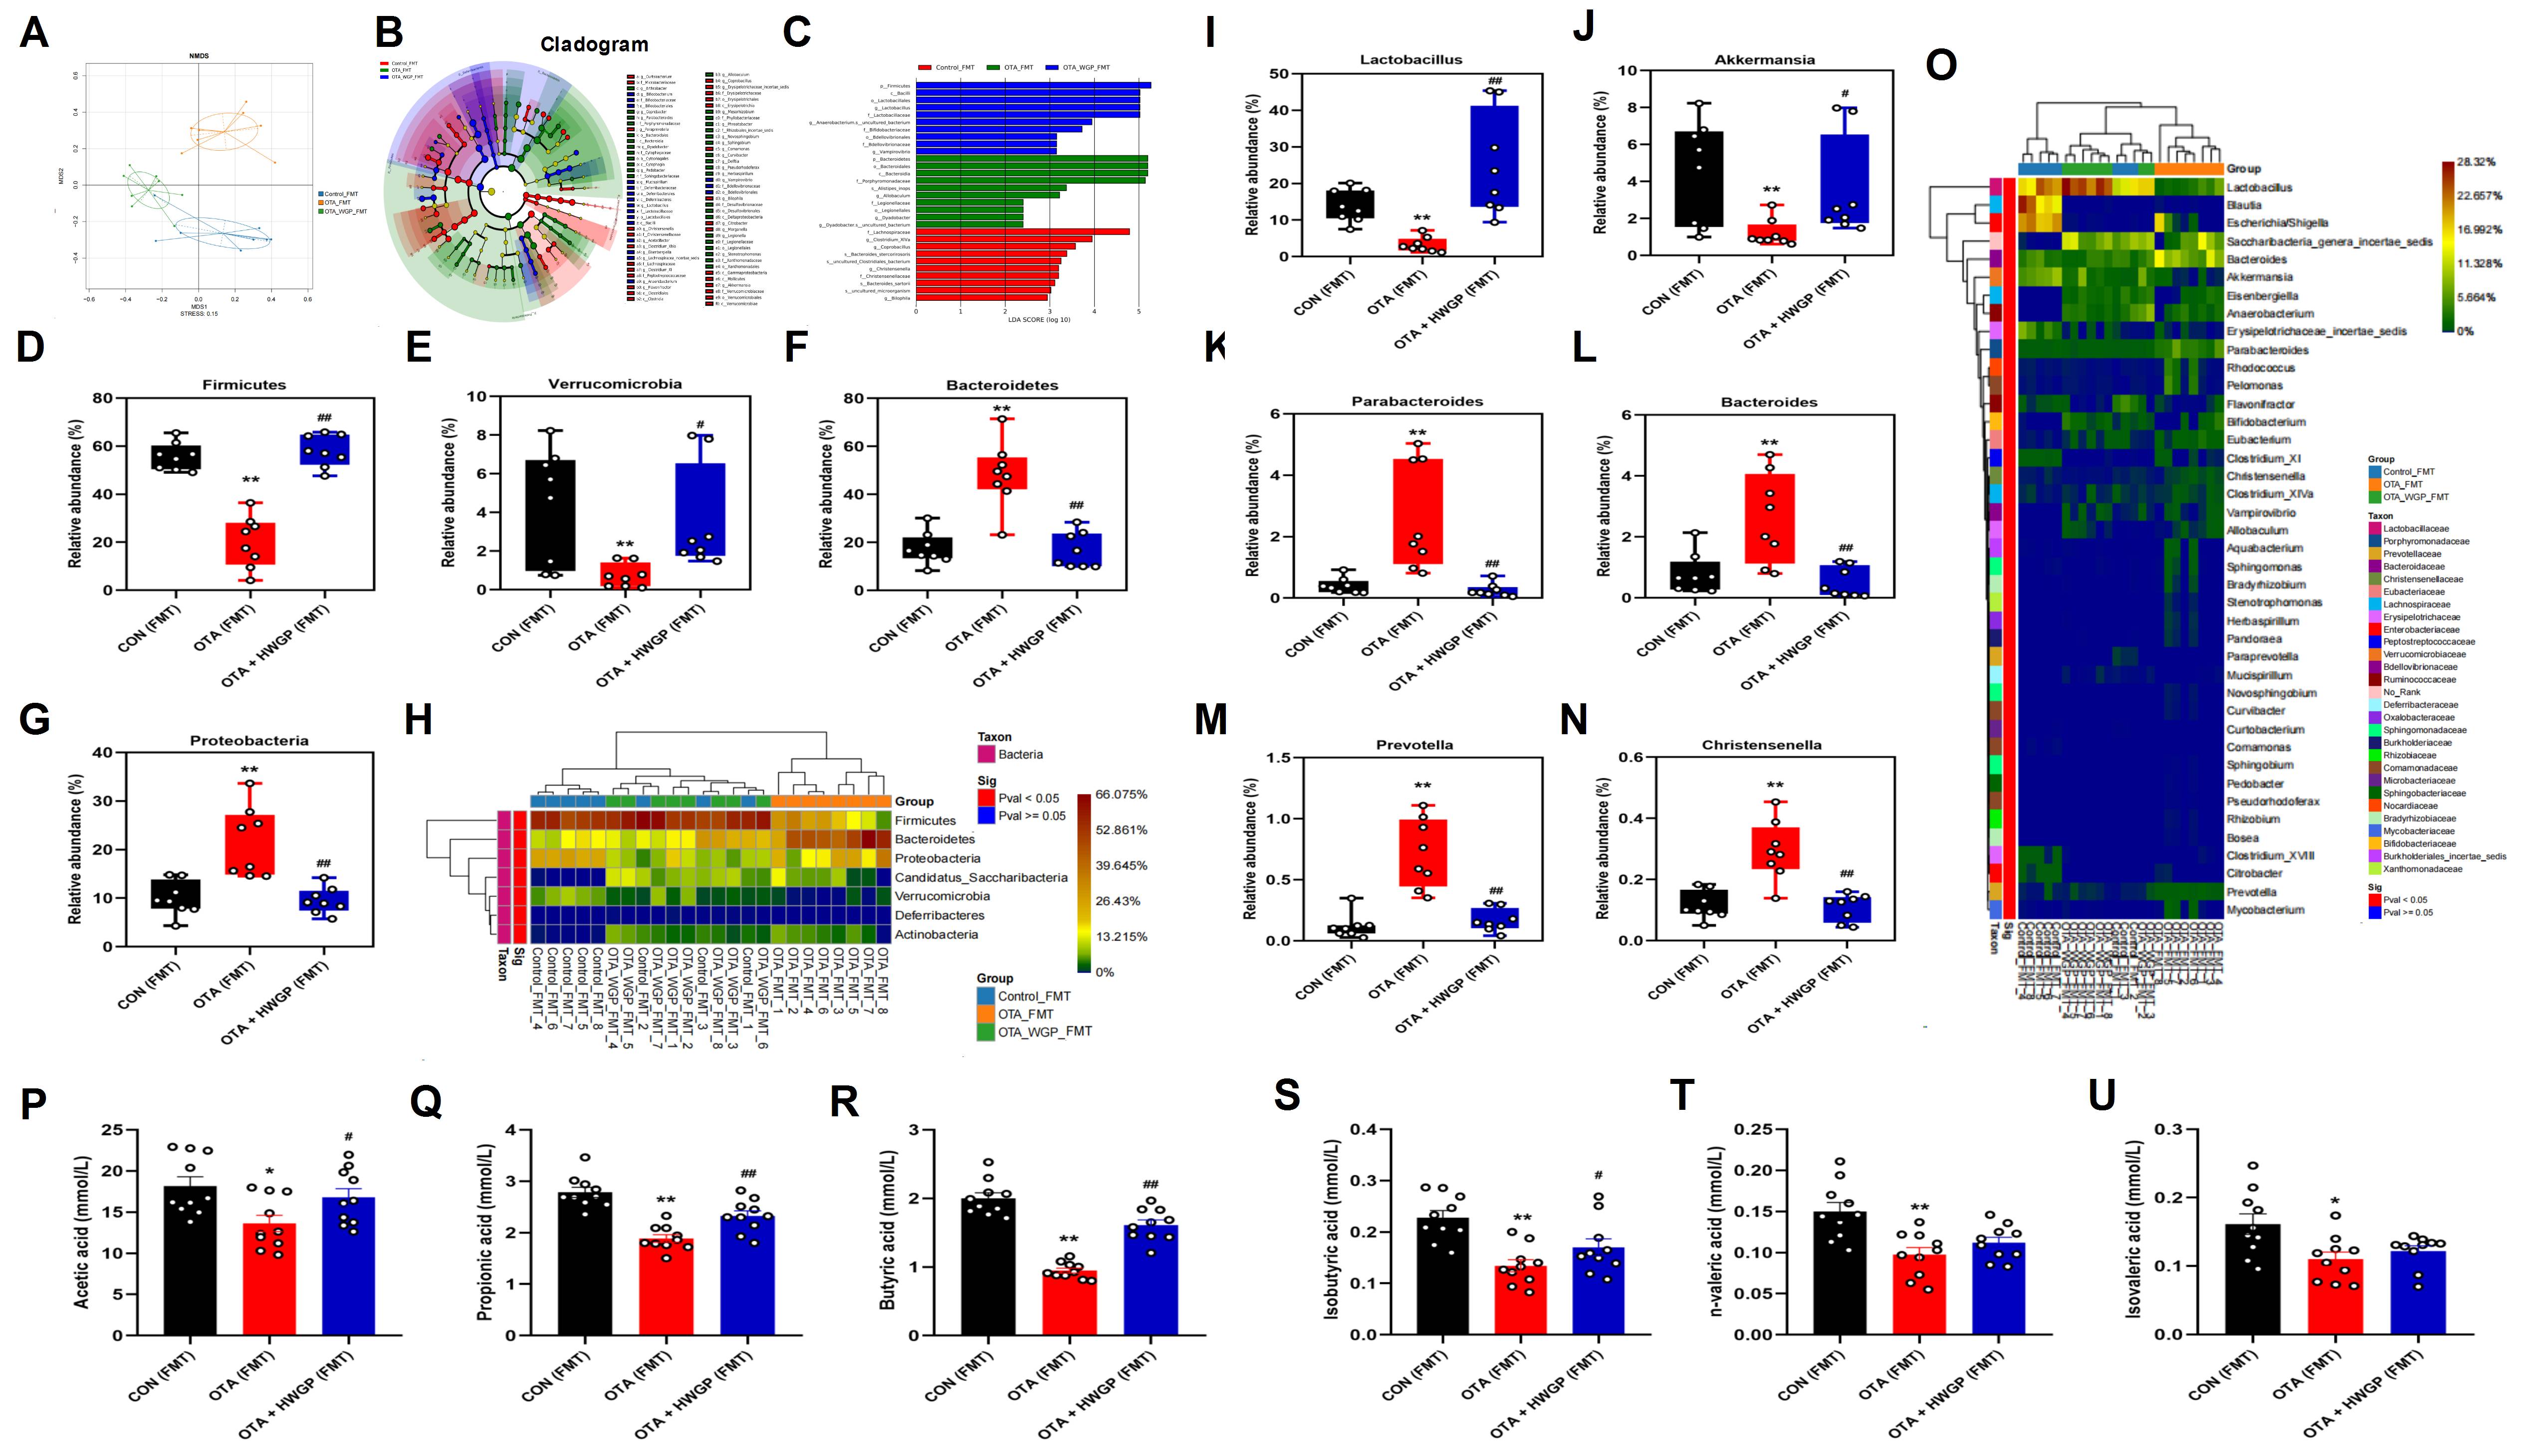


**Fig. S8 Composition of the gut microbiota and SCFA levels in FMT-treated mice.**

(A) PCoA of microbiota communities in the cecum; (B) LEfSe multi-level tree map; (C) LDA analysis (log10 LDA > 2.0); (D) Firmicutes abundance; (E) Verrucomicrobia abundance; (F) Bacteroidetes abundance; (G) Proteobacteria abundance; (H) Heatmap of the differential abundance of gut microbiota at the phylum level. The colors in the figure represent the relative abundance of the species, with a gradient from blue to red indicating the relative abundance of the species from small to large; (I) Lactobacillus abundance; (J) Akkermansia abundance; (K) Parabacteroide abundance; (L) Bacteroides abundance; (M) Prevotella abundance; (N) Christensenella abundance; (O) Heatmap of the differential abundance of gut microbiota at the genus level; (P) acetic acid level; (Q) propionic acid level; (R) butyric acid level; (S) isobutyric acid level; (T) n-valeric acid level; (U) isovaleric acid level. The data represent the mean ± SEM, *P* < 0.05 was set as the threshold for significance by one-way ANOVA followed by post hoc comparisons using Tukey’s test for multiple groups’ comparisons, **P* < 0.05, ***P* < 0.01, compared with CON (FMT) group; **#***P* < 0.05, **##***P* < 0.01, compared with OTA (FMT) group.


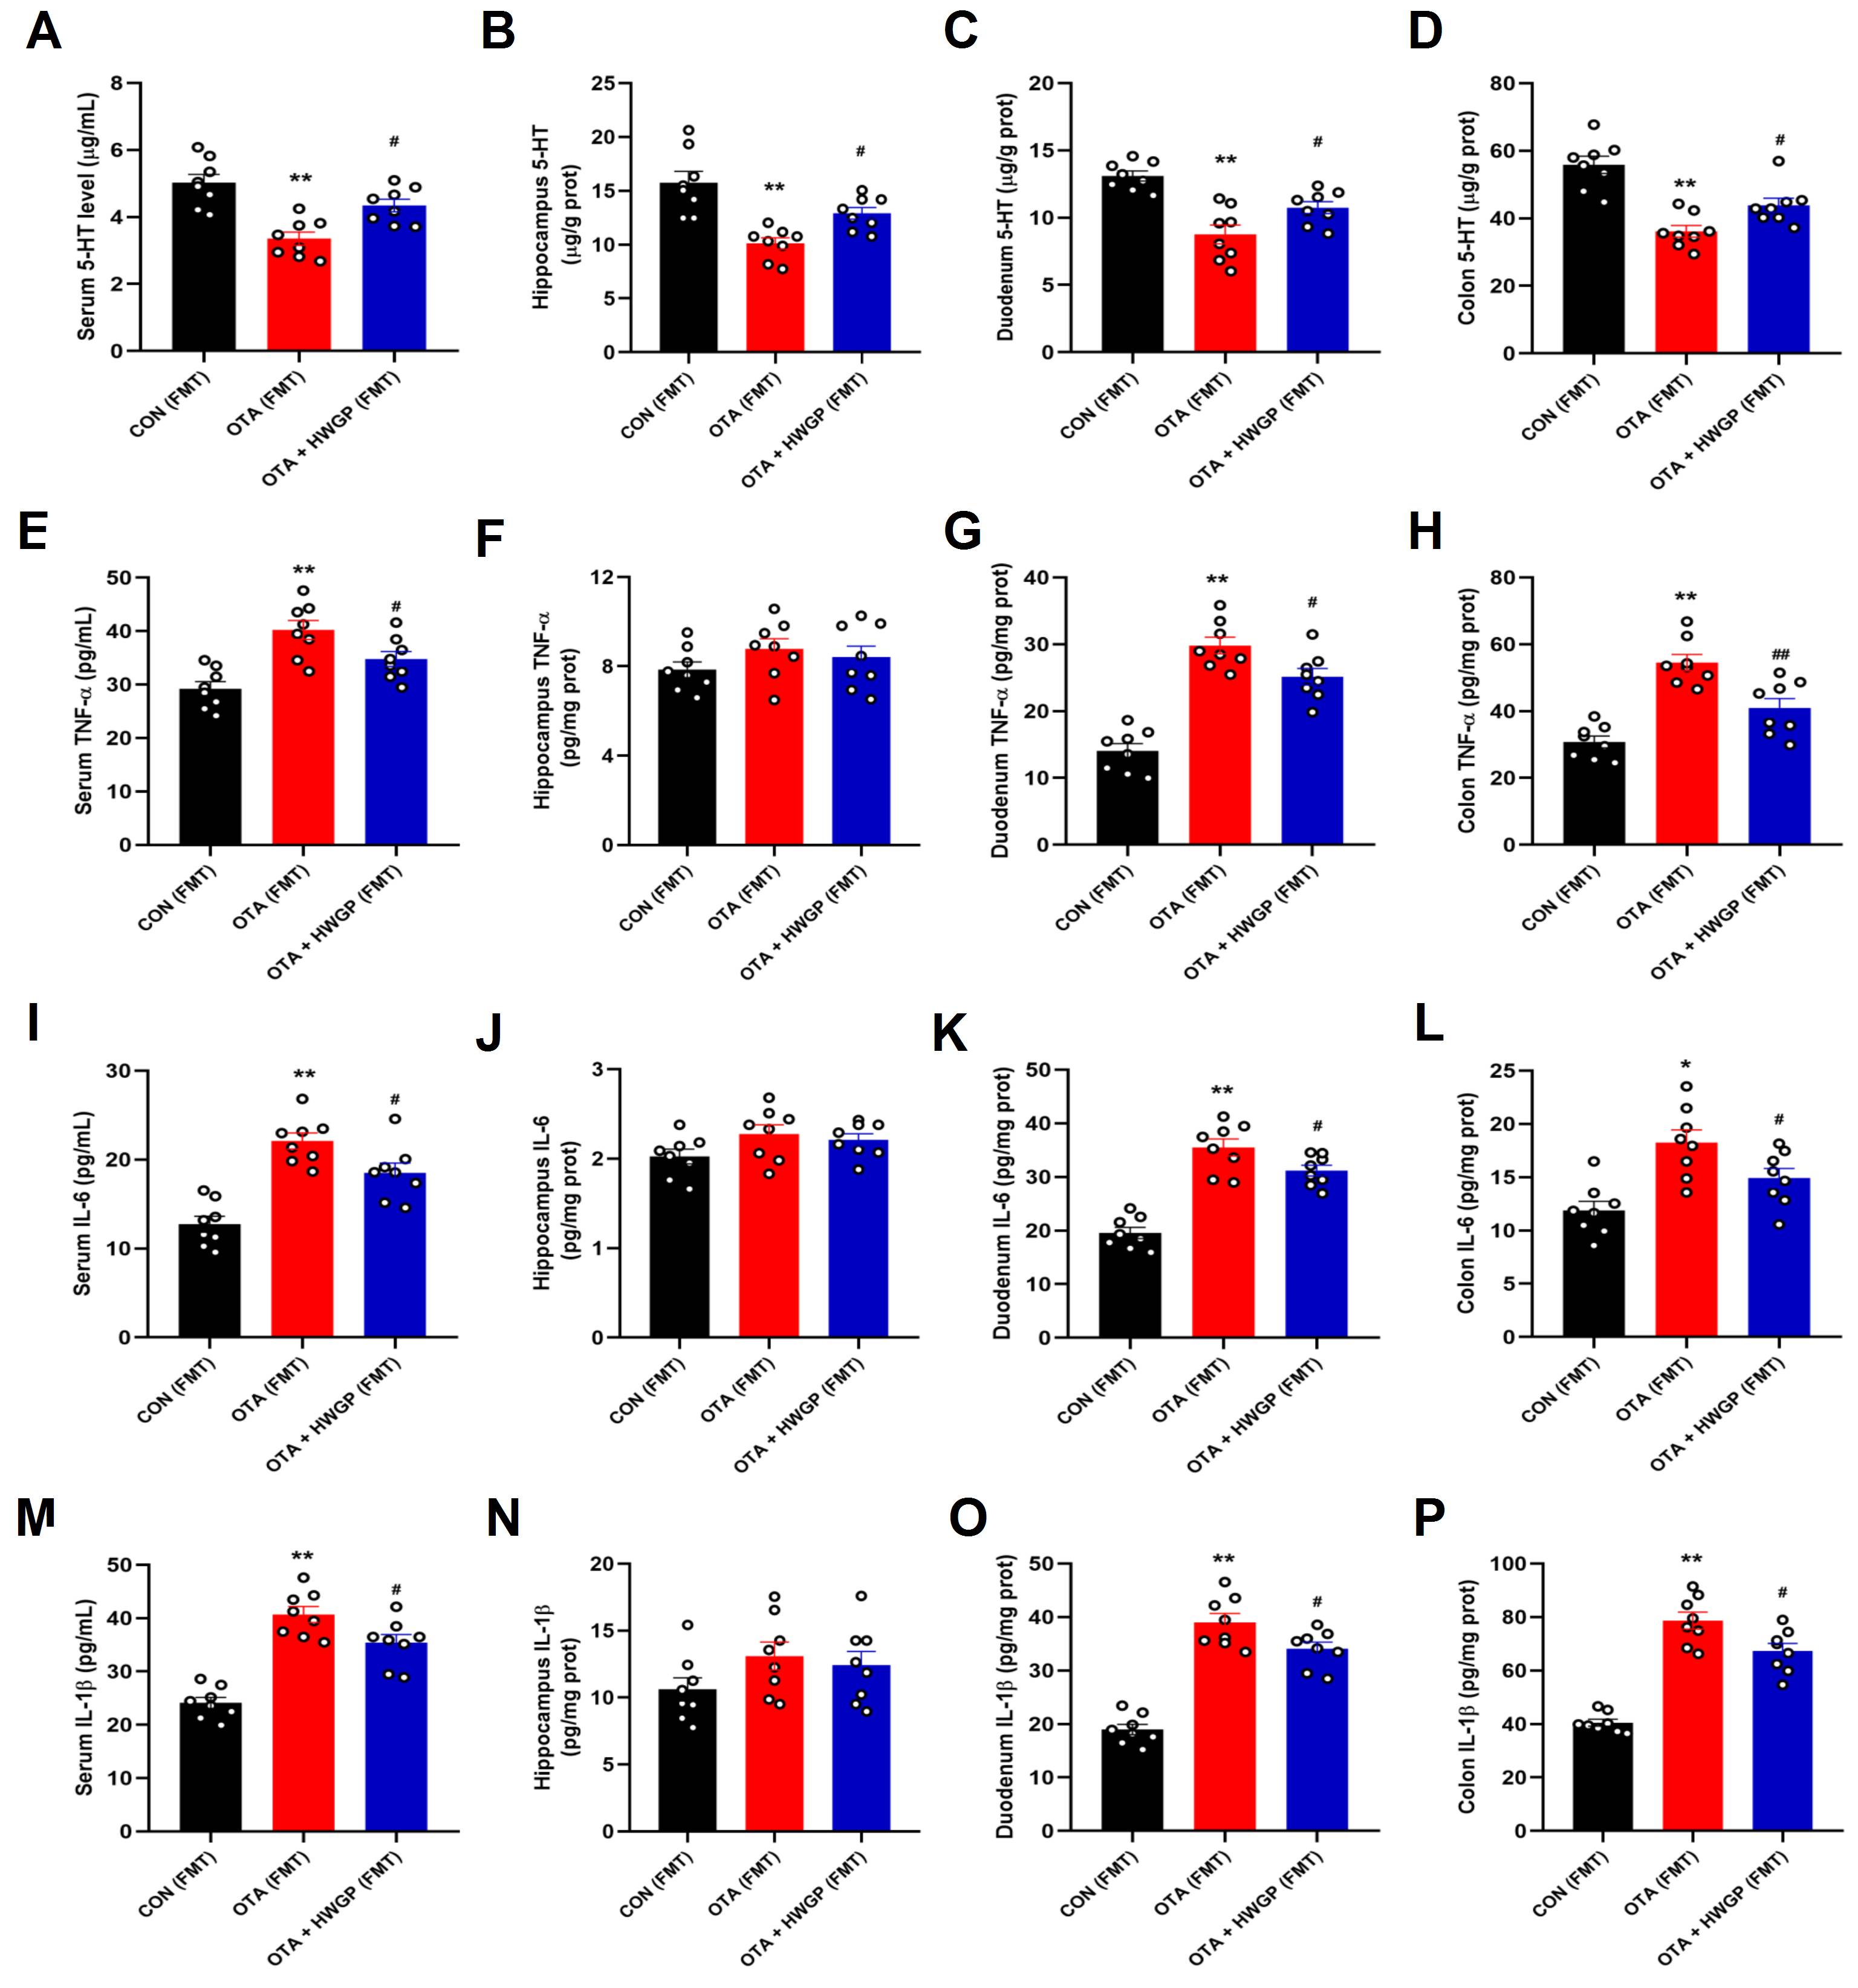


**Fig. S9 The levels of inflammatory factors and neurotransmitter levels in serum, hippocampus, duodenum and colon of FMT-treated mice.**

(A-D) 5-HT levels; (E-H) TNF-α levels; (I-L) IL-6 levels; (M-P) IL-1β levels. Values are mean ± SE; **P* < 0.05, ***P* < 0.01, compared with CON (FMT) group, **#***P* < 0.05, **##***P* < 0.01,compared with OTA (FMT) group.


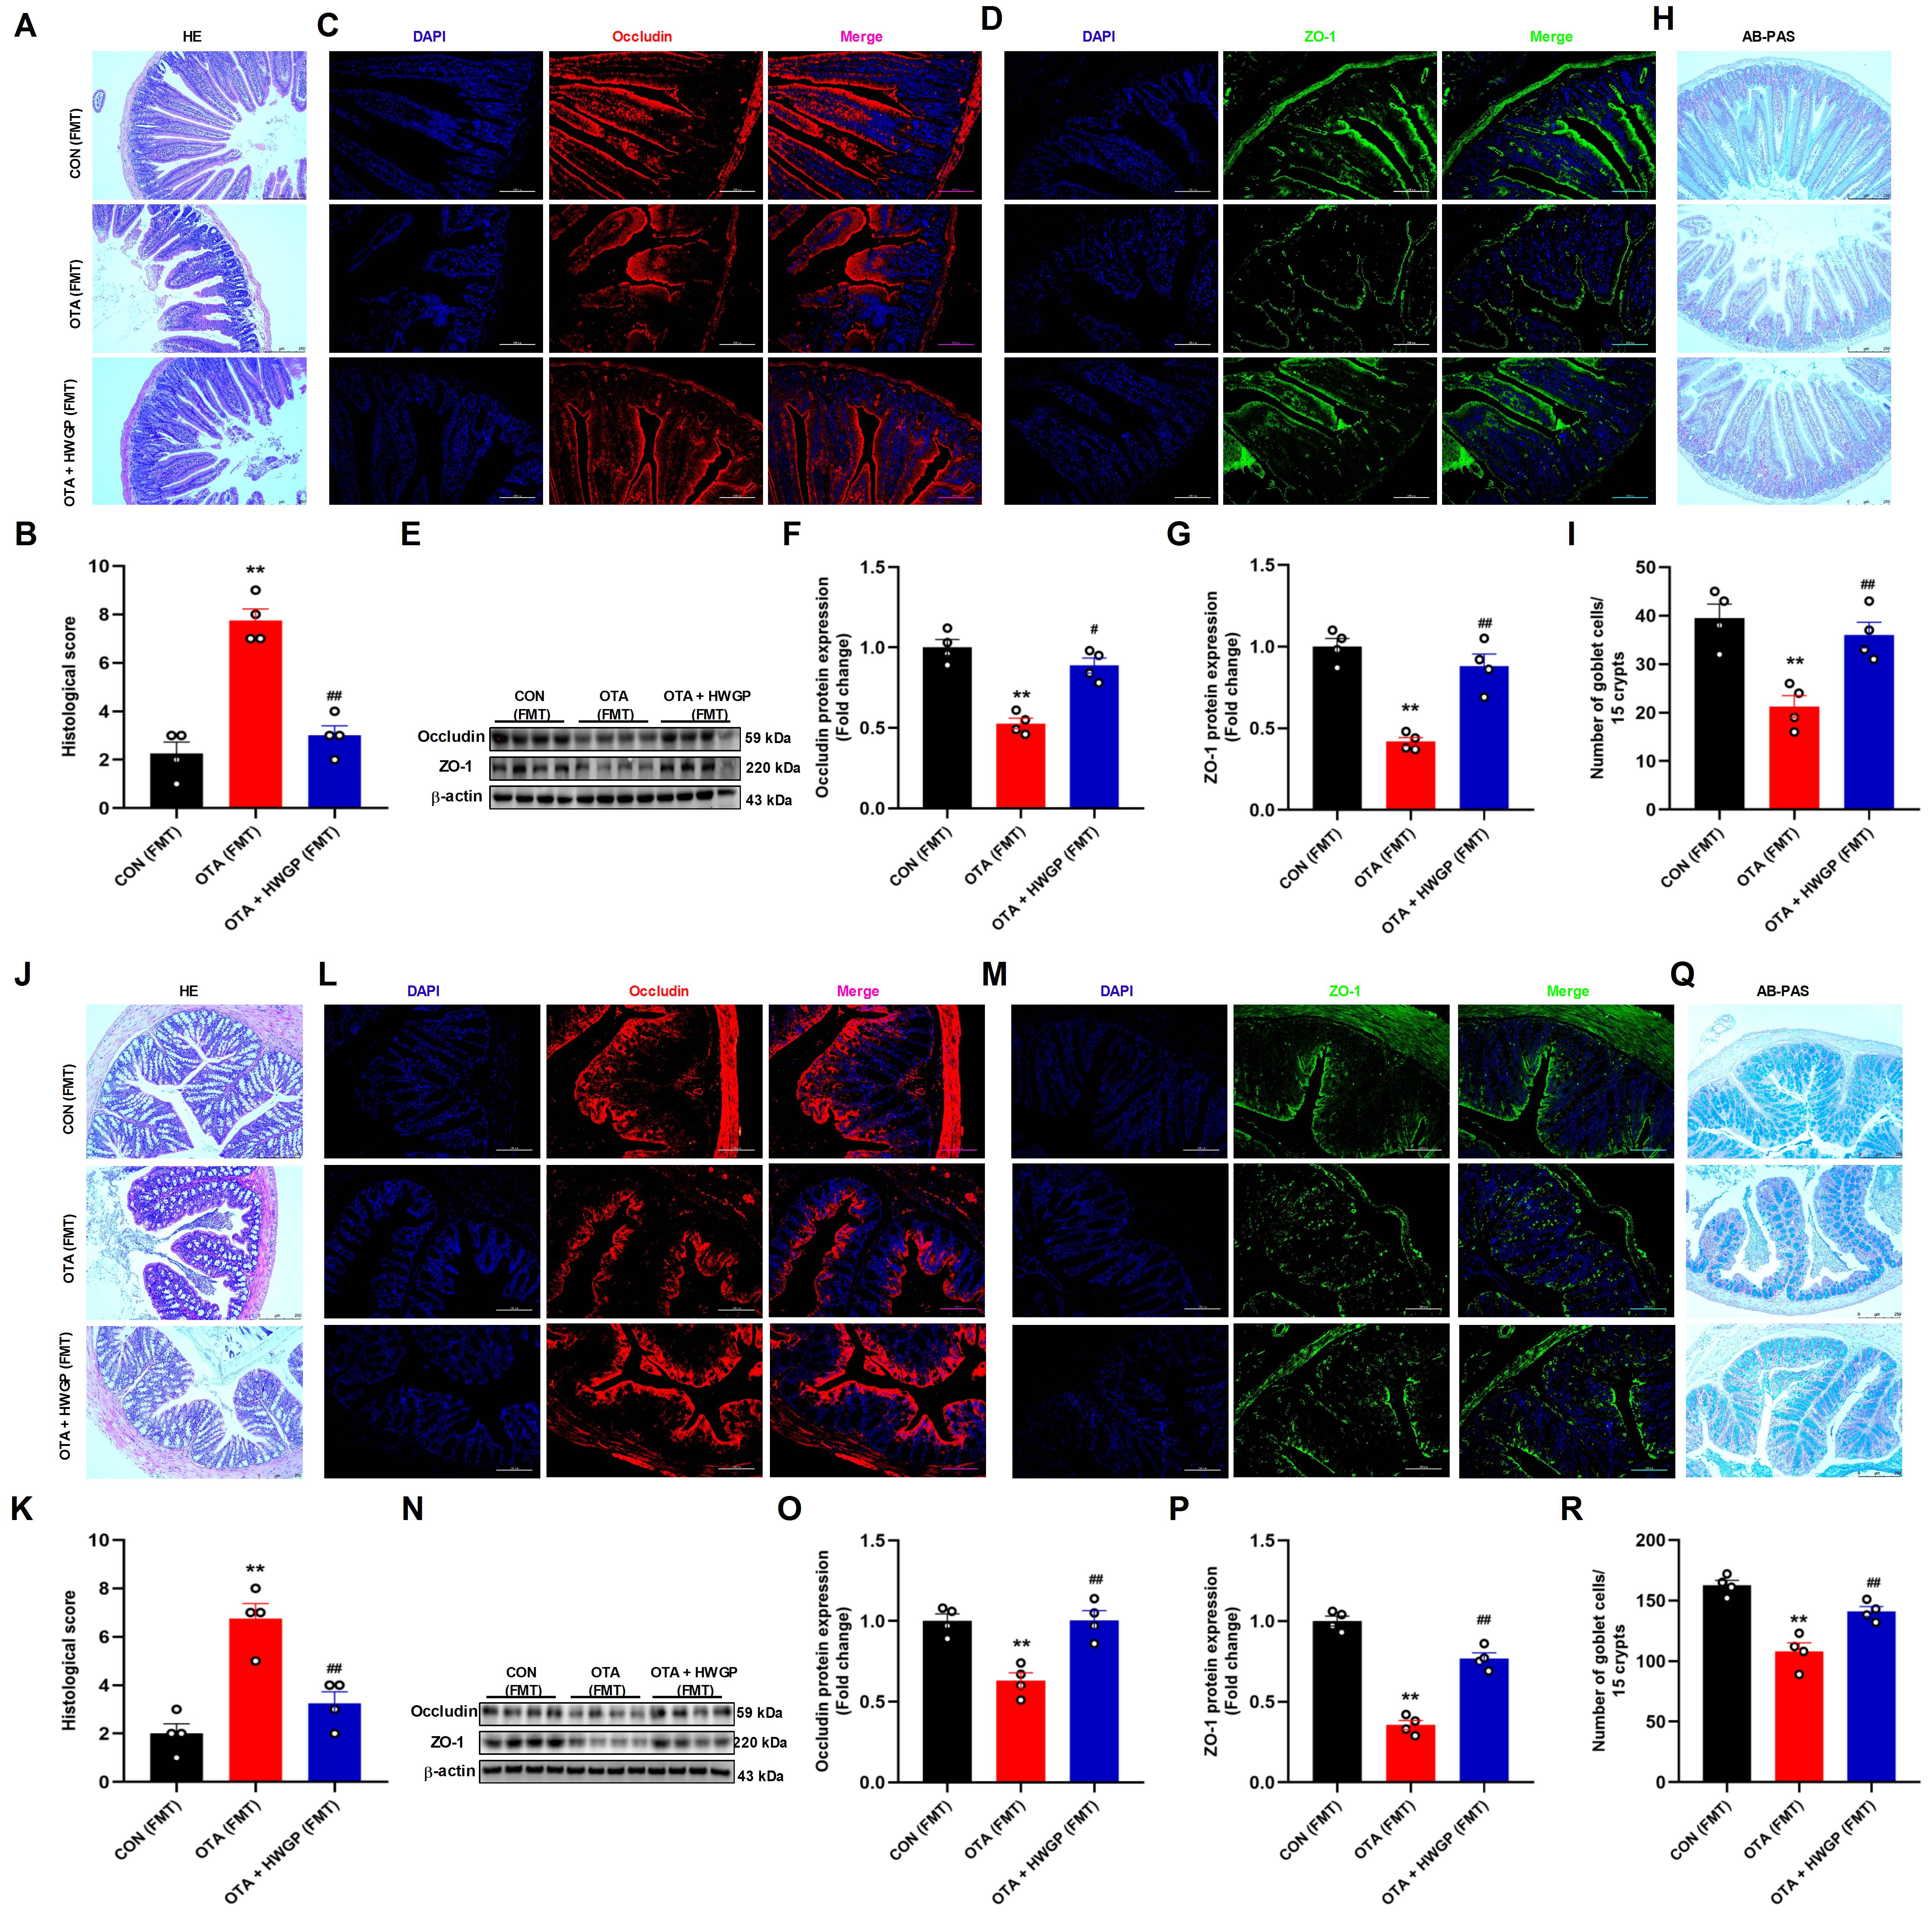


**Fig. S10 Intestinal morphology, tight junction protein expression and number of goblets in duodenum and colon of FMT-treated mice.**

(A) HE staining in duodenum; (B) Histological score in duodenum; (C) Immunofluorescent staining of Occludin protein in duodenum; (D) Immunofluorescent staining of ZO-1 protein in duodenum; (E-G) Occludin and ZO-1 protein expression in duodenum; (H) AB-PAS staining in duodenum; (I) Number of goblets in duodenum; (J) HE staining in colon; (K) Histological score in colon; (L) Immunofluorescent staining of Occludin protein in colon; (M) Immunofluorescent staining of ZO-1 protein in colon; (N-P) Occludin and ZO-1 protein expression in colon; (Q) AB-PAS staining in colon; (R) Number of goblets in colon. Values are mean ± SE; **P* < 0.05, ***P* < 0.01, compared with CON (FMT) group, **#***P* < 0.05, **##***P* < 0.01, compared with OTA+HWGP (FMT) group.


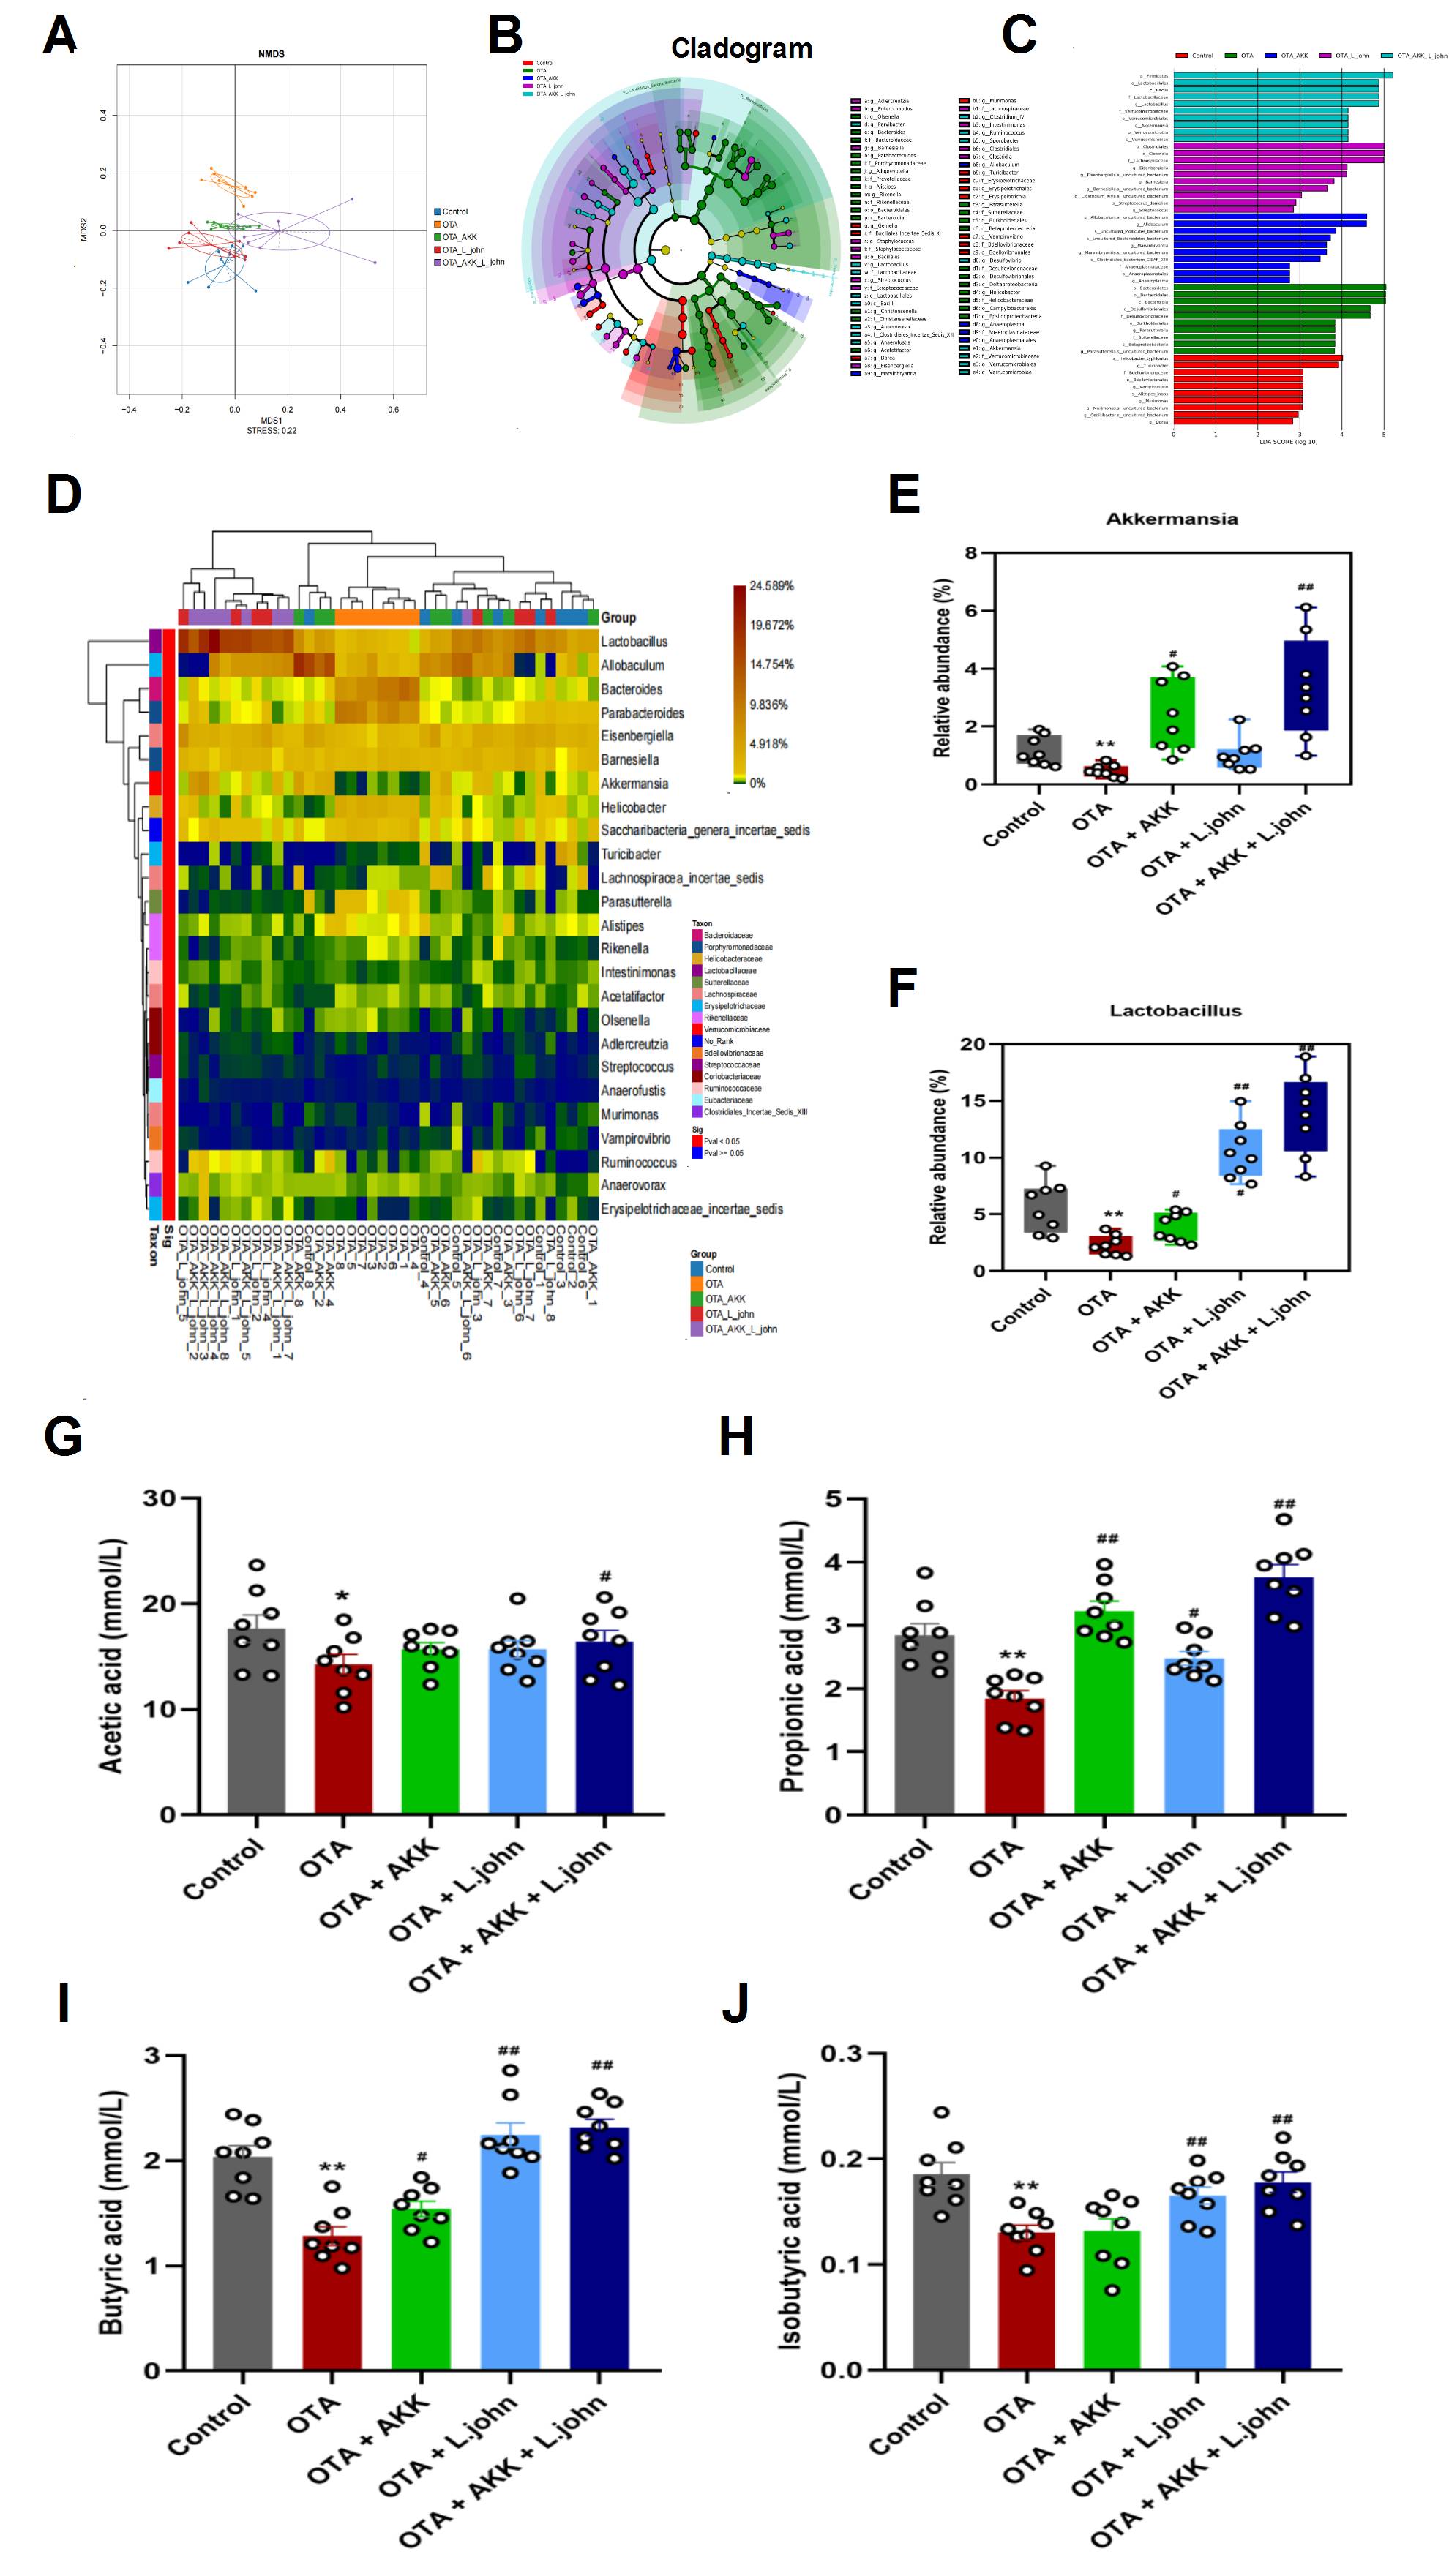


**Fig. S11 The influence of *AKK* and *L.john* on gut microbiota and SCFA levels in OTA-treated mice.**

(A) PCoA of microbiota communities in the cecum; (B) LEfSe multi-level tree map; (C) LDA analysis (log10 LDA > 2.0); (D) Heatmap of the differential abundance of gut microbiota at the genus level. The colors in the figure represent the relative abundance of the species, with a gradient from blue to red indicating the relative abundance of the species from small to large; (E) *Akkermansia* abundance; (F) *Lactobacillus* abundance; (G) acetic acid level; (H) propionic acid level; (I) butyric acid level; (J) isobutyric acid level. The data represent the mean ± SEM, *P* < 0.05 was set as the threshold for significance by one-way ANOVA followed by post hoc comparisons using Tukey’s test for multiple groups’ comparisons, **P* < 0.05, ***P* < 0.01, compared with Control group; **#***P* < 0.05, **##***P* < 0.01, compared with OTA group.


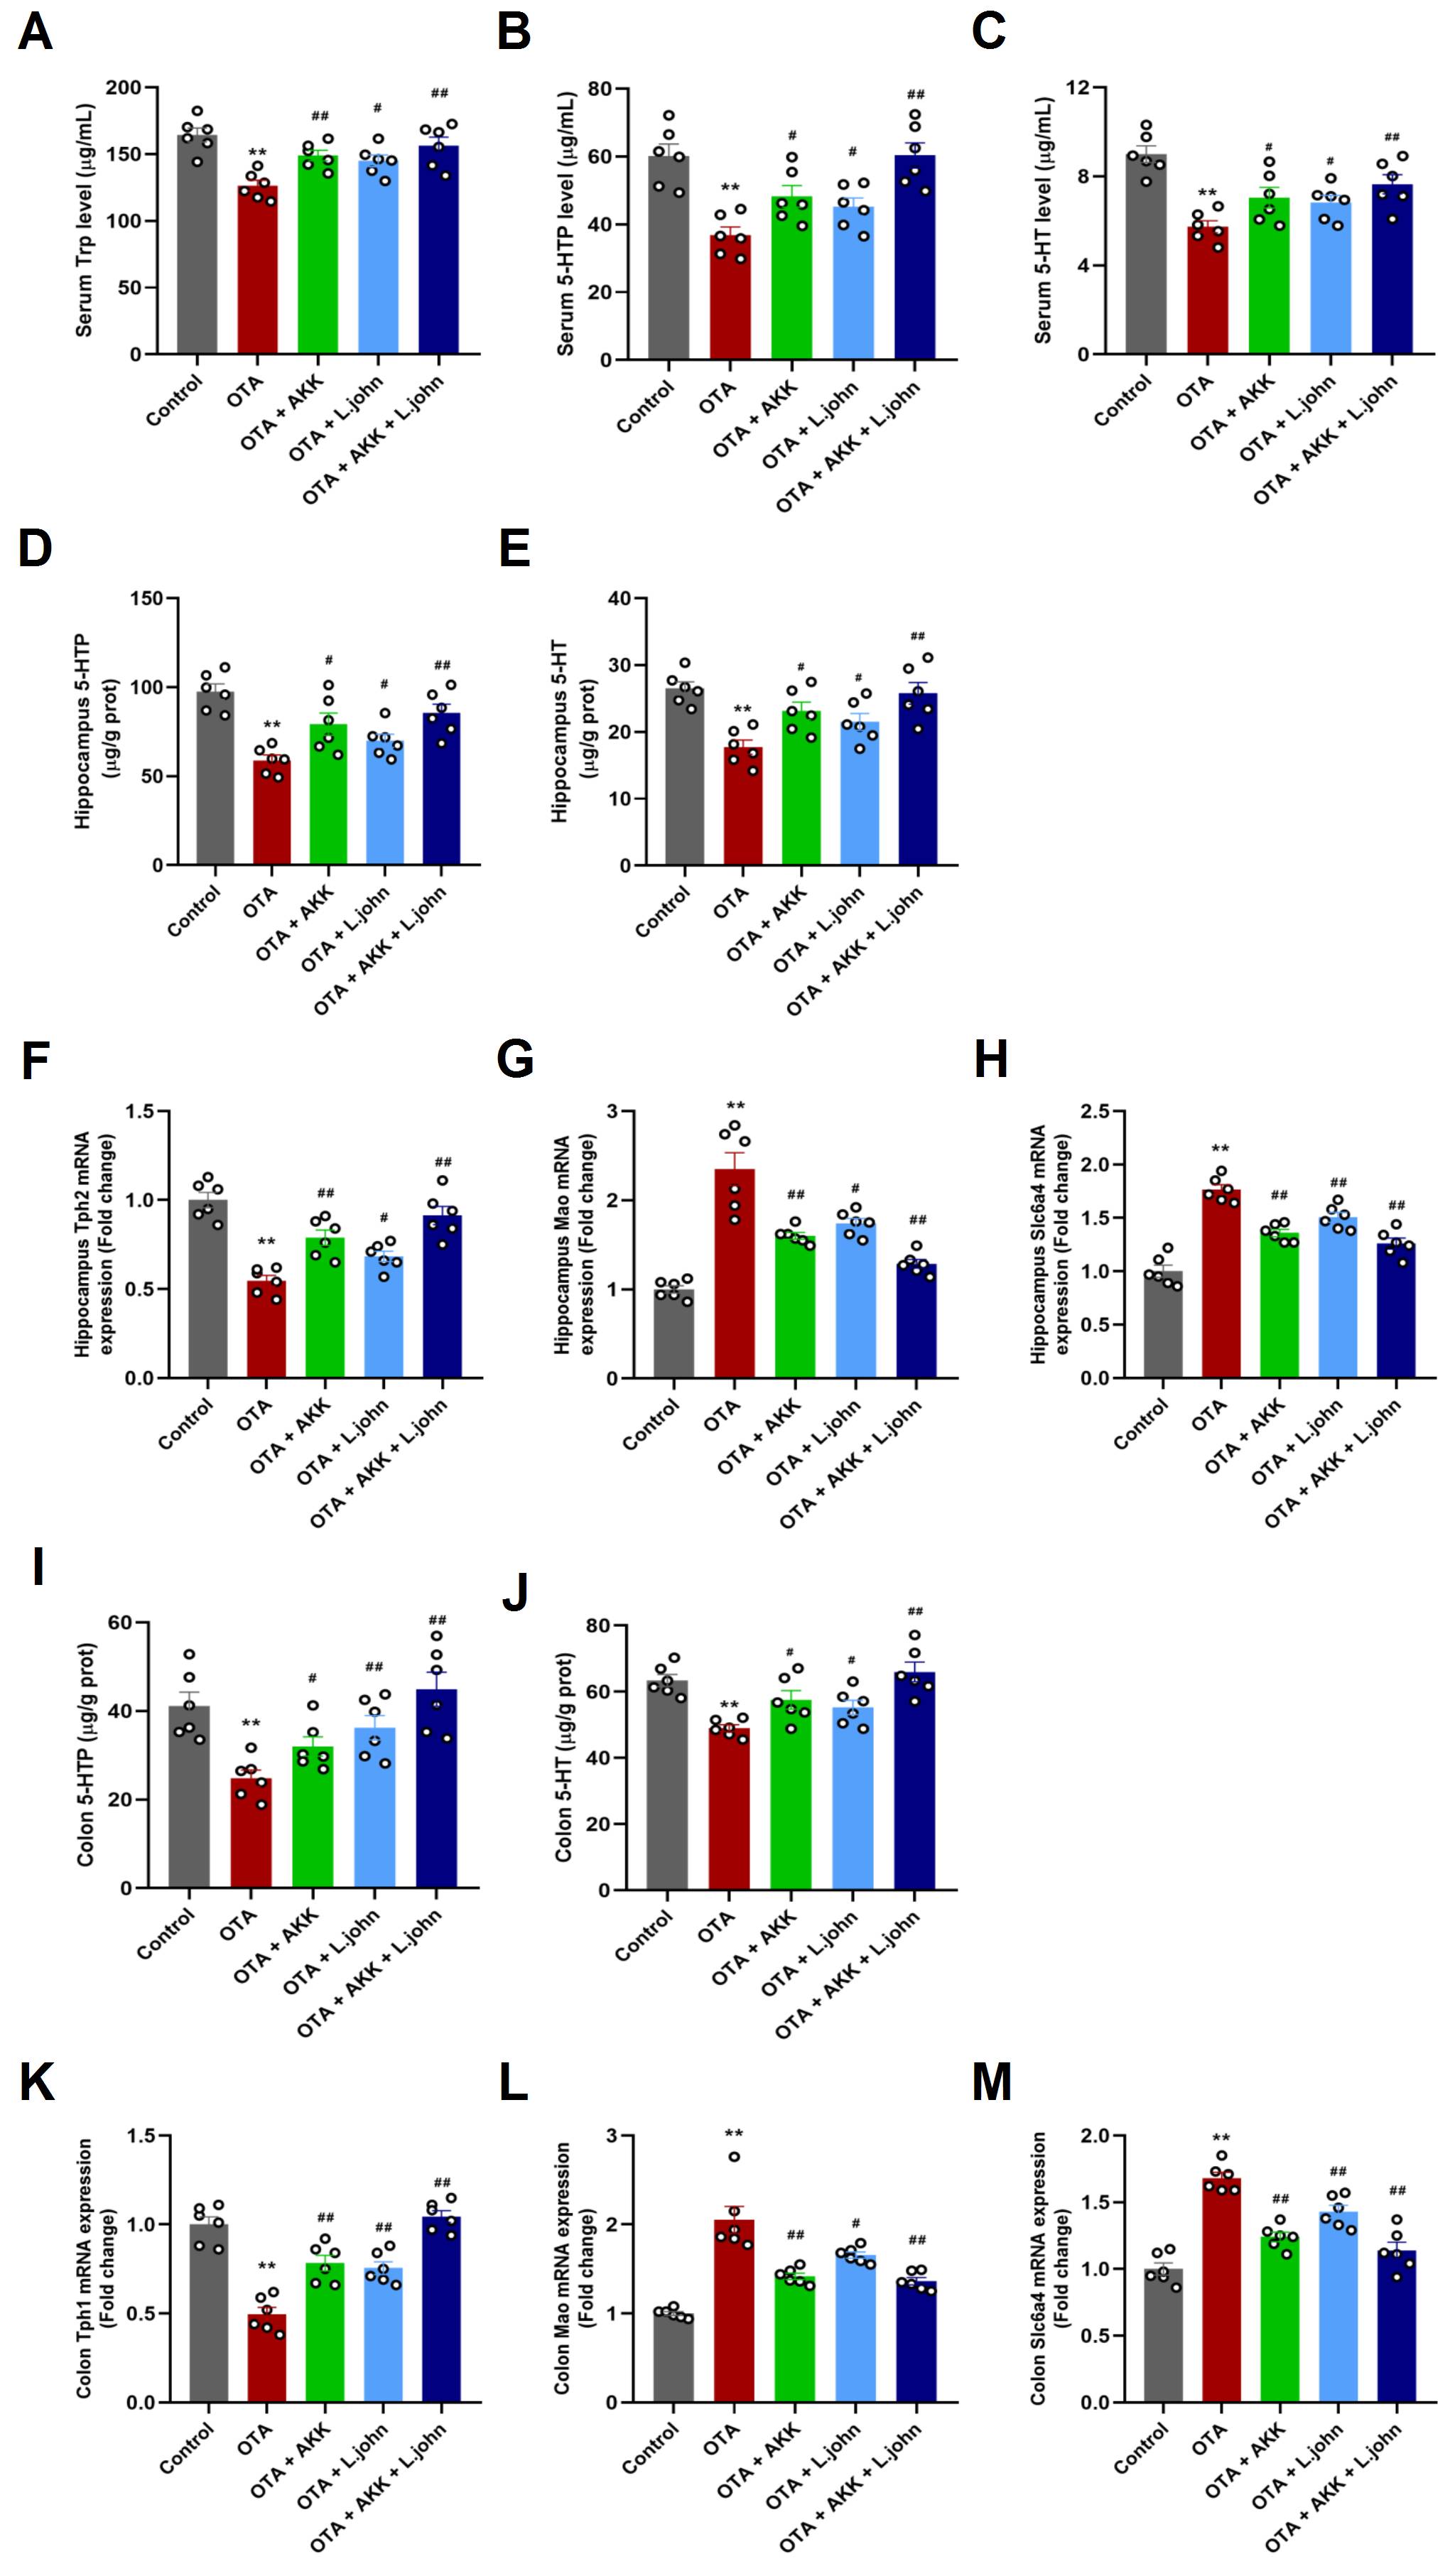


**Fig. S12 The influence of *AKK* and *L.john* on the synthesis and metabolism of 5-HT in OTA-treated mice.**

(A) Serum Trp level; (B) Serum 5-HTP level; (C) Serum 5-HT level; (D) Hippocampus 5-HTP level; (E) Hippocampus 5-HT level; (F) Hippocampus Thp2 mRNA expression; (G) Hippocampus Mao expression; (H) Hippocampus Slc6a4 mRNA expression; (I) Colon 5-HTP level; (J) Colon 5-HT level; (K) Colon Thp2 mRNA expression; (L) Colon Mao expression; (M) Colon Slc6a4 mRNA expression. The data represent the mean ± SEM, *P* < 0.05 was set as the threshold for significance by one-way ANOVA followed by post hoc comparisons using Tukey’s test for multiple groups’ comparisons, **P* < 0.05, ***P* < 0.01, compared with Control group; **#***P* < 0.05, **##***P* < 0.01, compared with OTA group.


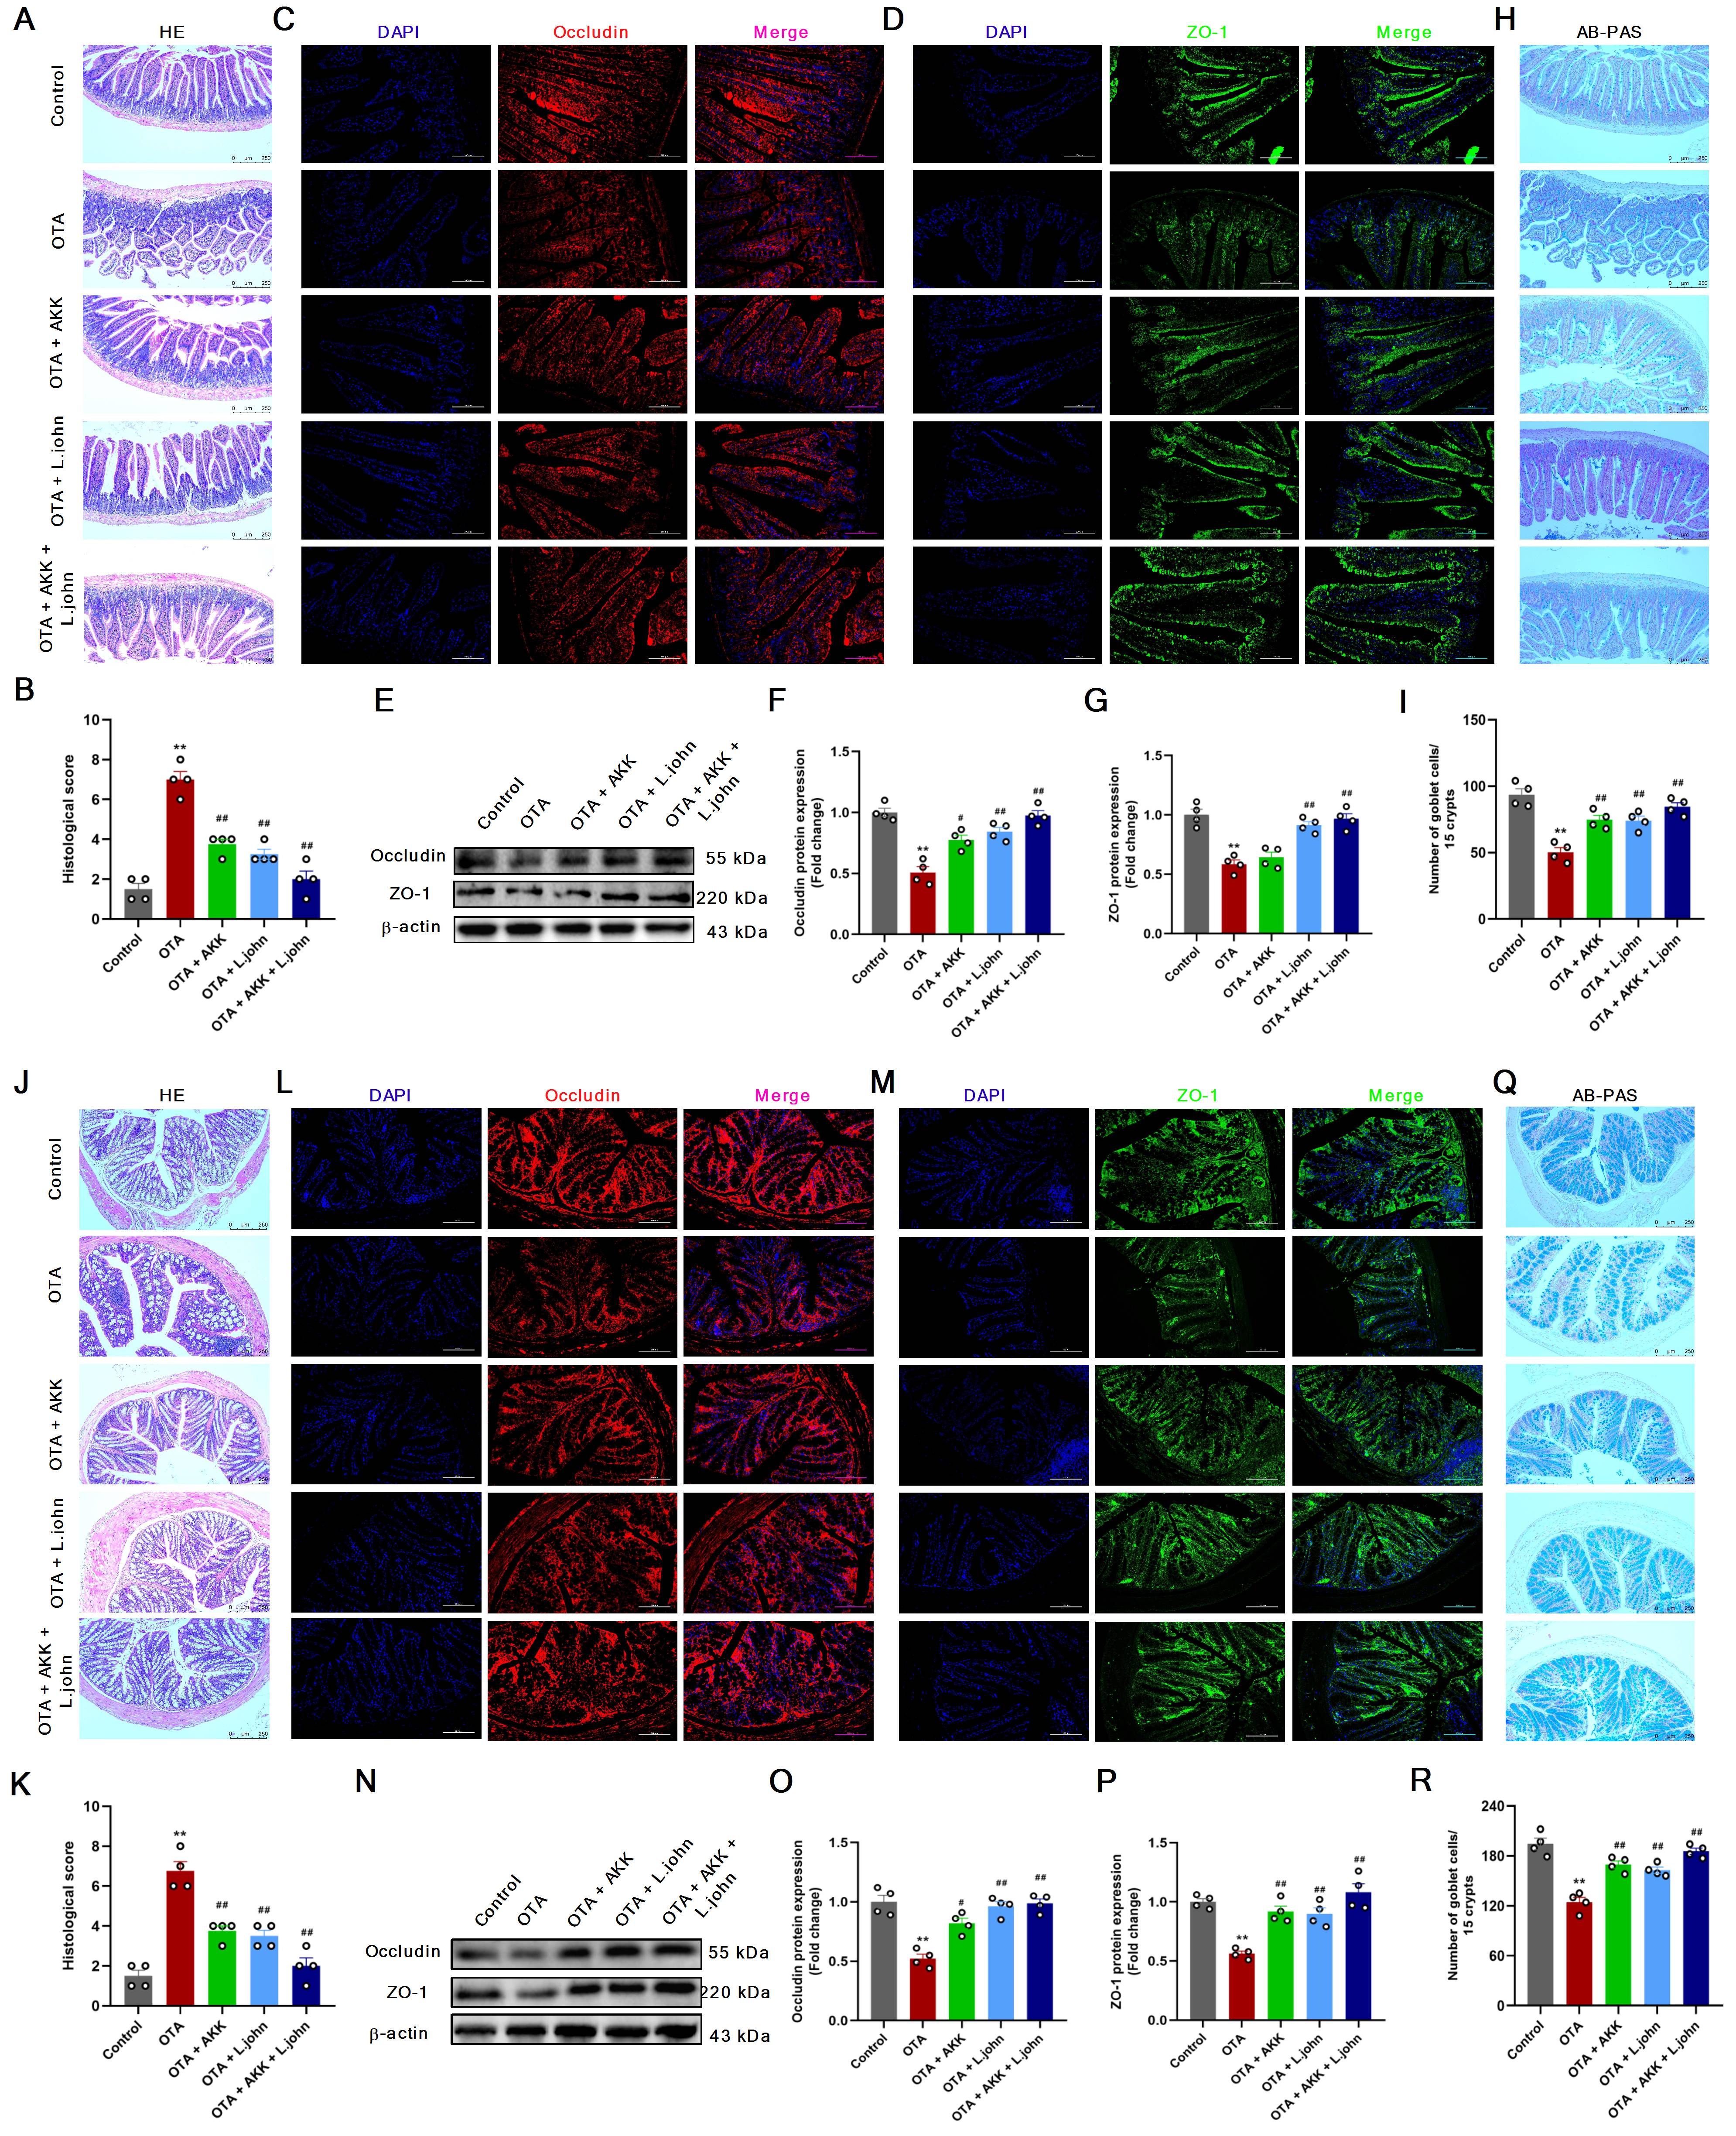


**Fig. S13 Effect of *AKK* and *L.john* on intestinal morphology, tight junction protein and number of goblets in duodenum and colon of OTA-treated mice.**

(A) HE staining in duodenum; (B) Histological score in duodenum; (C) Immunofluorescent staining of Occludin protein in duodenum; (D) Immunofluorescent staining of ZO-1 protein in duodenum; (E-G) Occludin and ZO-1 protein expression in duodenum; (H) AB-PAS staining in duodenum; (I) Number of goblets in duodenum; (J) HE staining in colon; (K) Histological score in colon; (L) Immunofluorescent staining of Occludin protein in colon; (M) Immunofluorescent staining of ZO-1 protein in colon; (N-P) Occludin and ZO-1 protein expression in colon; (Q) AB-PAS staining in colon; (R) Number of goblets in colon. Values are mean ± SE; **P* < 0.05, ***P* < 0.01, compared with Control group, **#***P* < 0.05, **##***P* < 0.01,compared with OTA group.


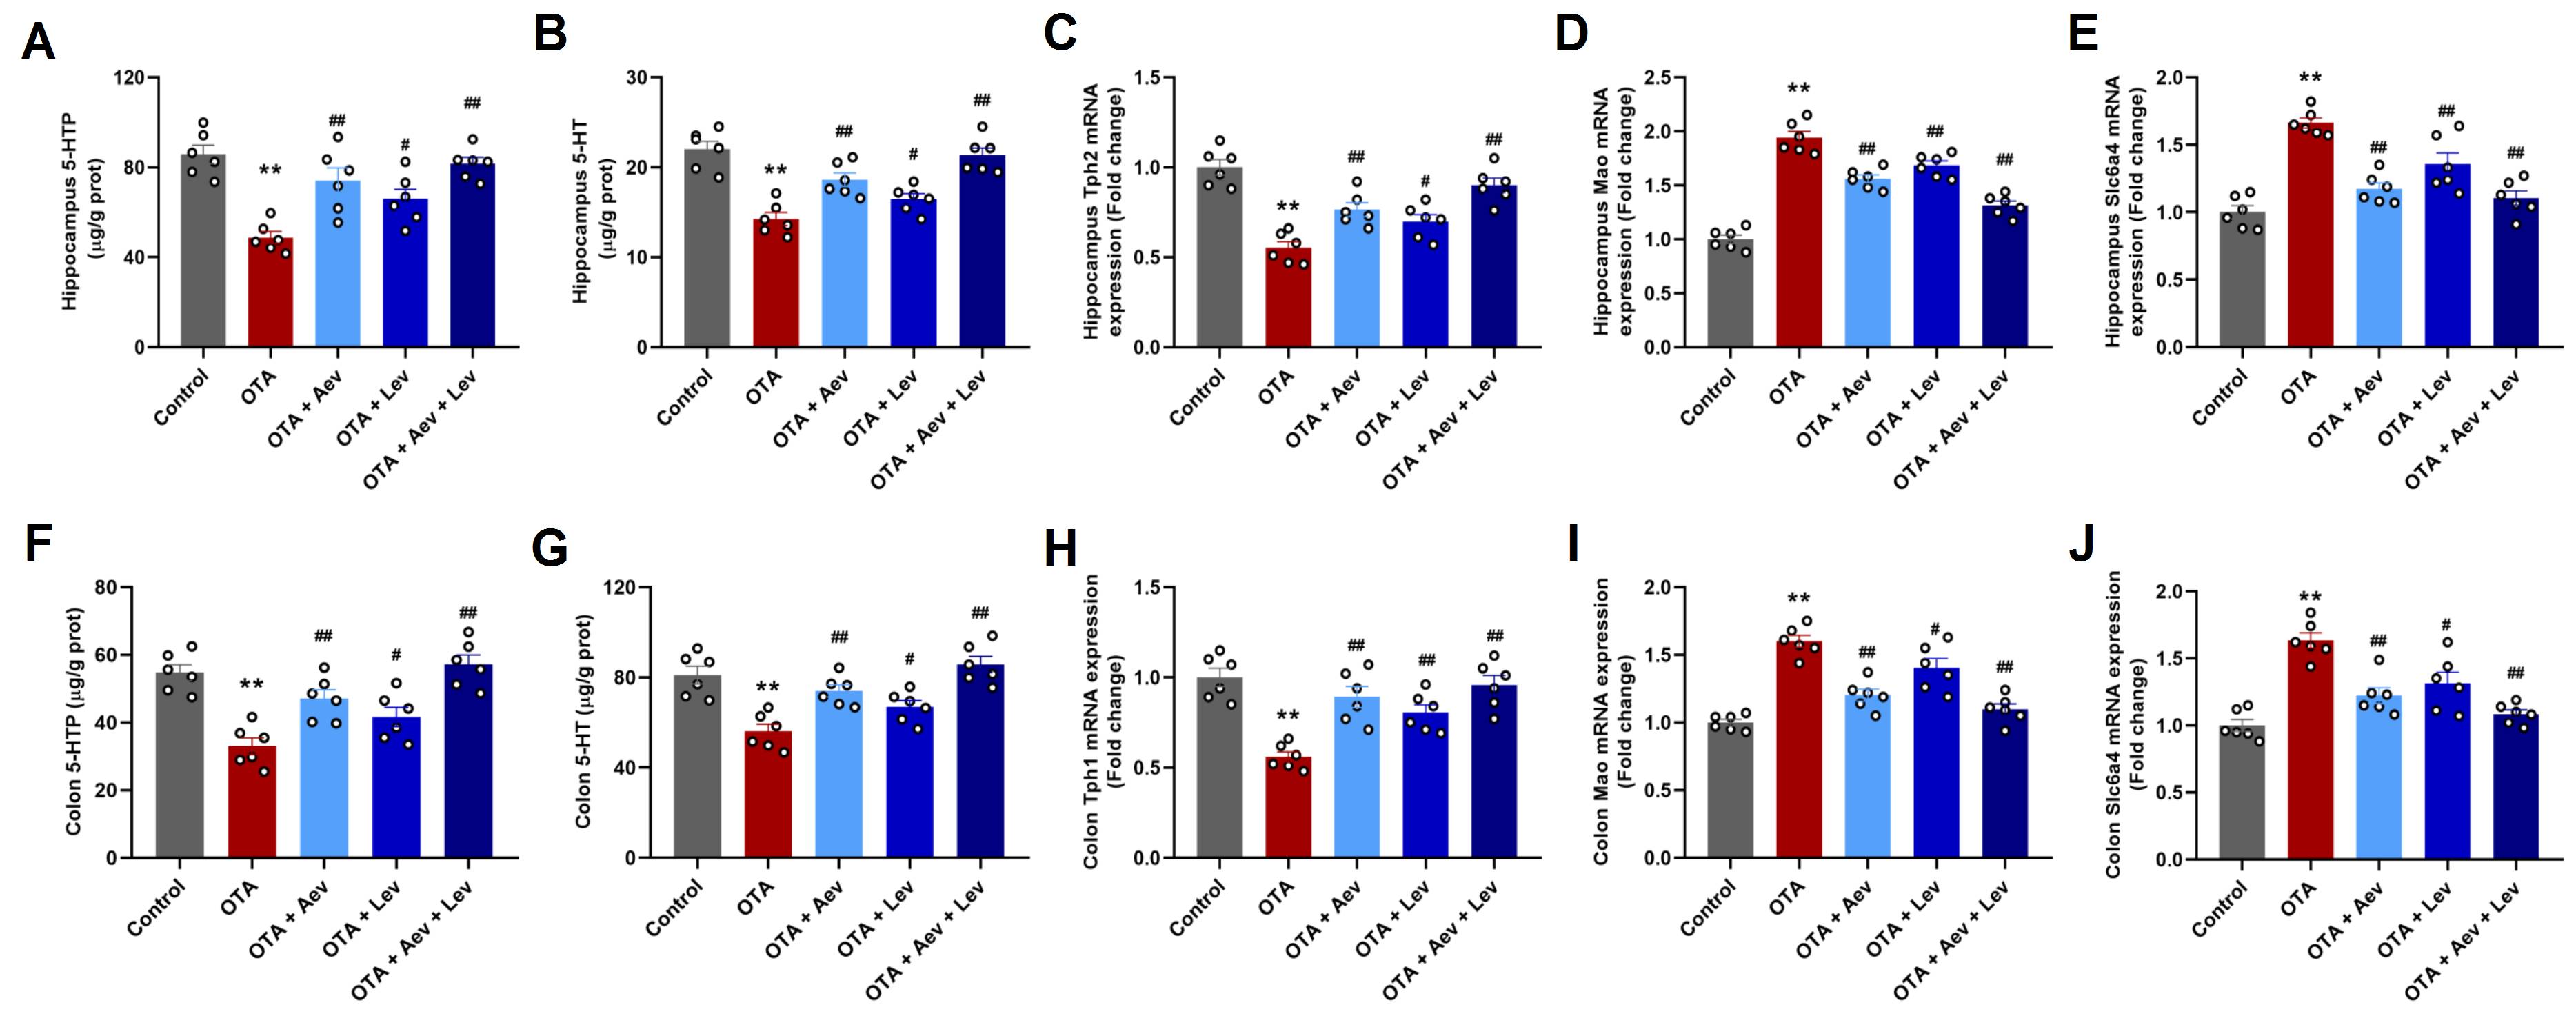


**Fig. S14 The influence of *AKK* and *L.john-drived* EVs on the synthesis and metabolism of 5-HT in OTA-treated mice.**

(A) Hippocampus 5-HTP level; (B) Hippocampus 5-HT level; (C) Hippocampus Thp2 mRNA expression; (D) Hippocampus Mao expression; (E) Hippocampus Slc6a4 mRNA expression; (F) Colon 5-HTP level; (G) Colon 5-HT level; (H) Colon Thp2 mRNA expression; (I) Colon Mao expression; (J) Colon Slc6a4 mRNA expression. The data represent the mean ± SEM, *P* < 0.05 was set as the threshold for significance by one-way ANOVA followed by post hoc comparisons using Tukey’s test for multiple groups’ comparisons, **P* < 0.05, ***P* < 0.01, compared with Control group; **#***P* < 0.05, **##***P* < 0.01, compared with OTA group.


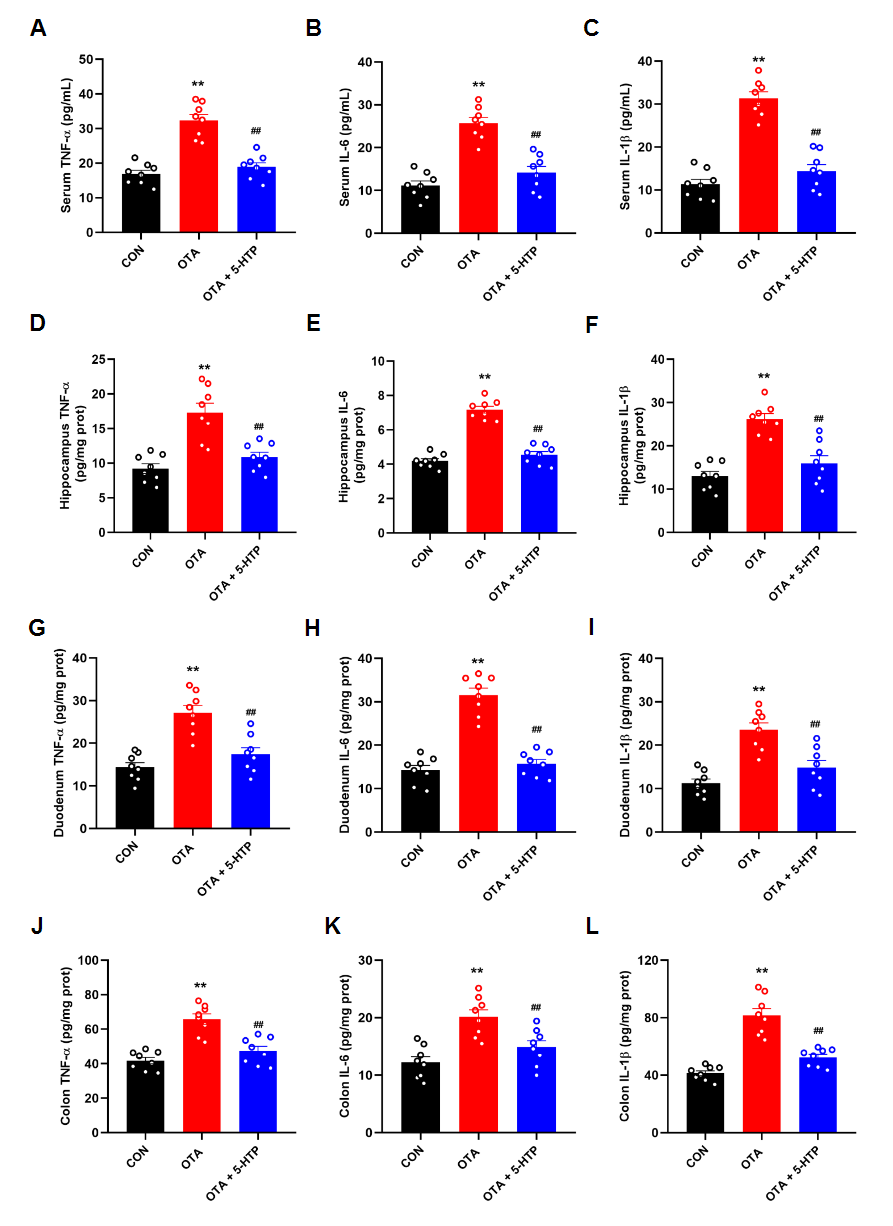


**Fig. S15 Effect of 5-HTP on inflammatory factors levels in serum, hippocampus and colon of OTA-treated mice.**

(A-C) TNF-α, IL-6 and IL-1β levels in serum; (D-F) TNF-α, IL-6 and IL-1β levels in hippocampus; (G-I) TNF-α, IL-6 and IL-1β levels in duodenum; (J-L) TNF-α, IL-6 and IL-1β levels in colon. Values are mean ± SE; **P* < 0.05, ***P* < 0.01, compared with CON group, **#***P* < 0.05, **##***P* < 0.01,compared with OTA group.


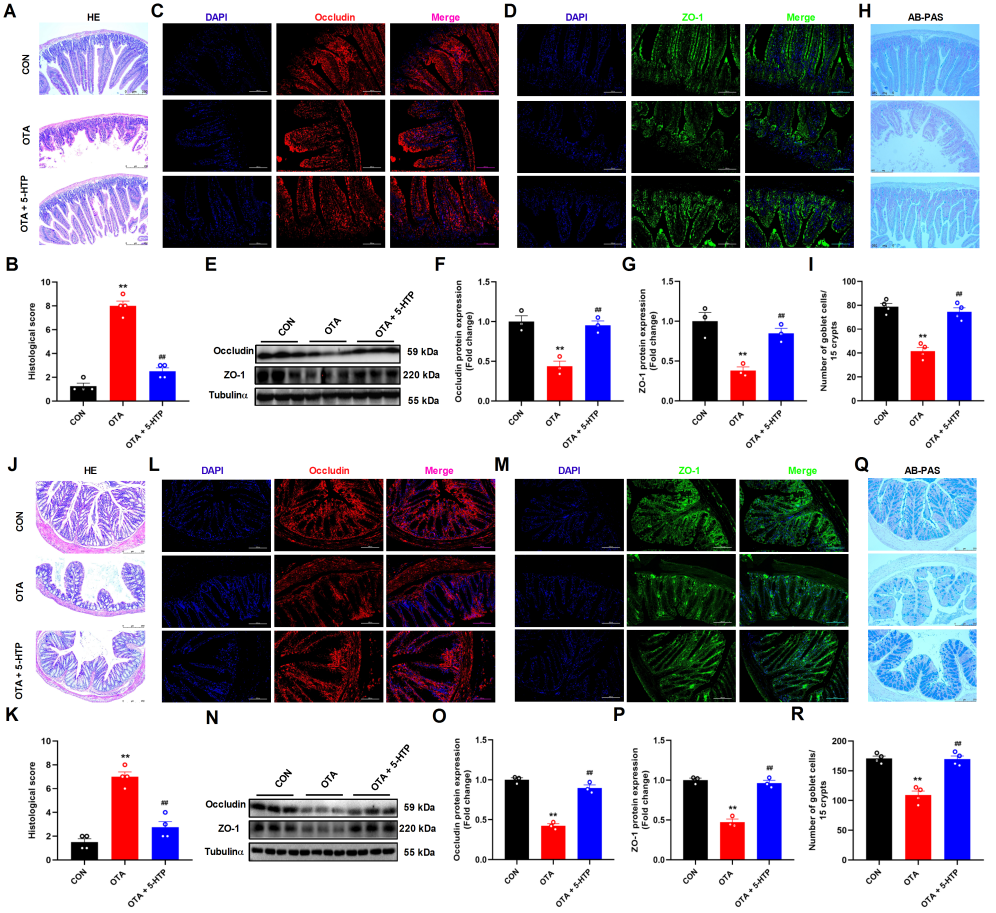


**Fig. S16 Effect of 5-HTP on intestinal morphology, tight junction protein and number of goblets in duodenum and colon of OTA-treated mice.**

(A) HE staining in duodenum; (B) Histological score in duodenum; (C) Immunofluorescent staining of Occludin protein in duodenum; (D) Immunofluorescent staining of ZO-1 protein in duodenum; (E-G) Occludin and ZO-1 protein expression in duodenum; (H) AB-PAS staining in duodenum; (I) Number of goblets in duodenum; (J) HE staining in colon; (K) Histological score in colon; (L) Immunofluorescent staining of Occludin protein in colon; (M) Immunofluorescent staining of ZO-1 protein in colon; (N-P) Occludin and ZO-1 protein expression in colon; (Q) AB-PAS staining in colon; (R) Number of goblets in colon. Values are mean ± SE; **P* < 0.05, ***P* < 0.01, compared with CON group, **#***P* < 0.05, **##***P* < 0.01,compared with OTA group.


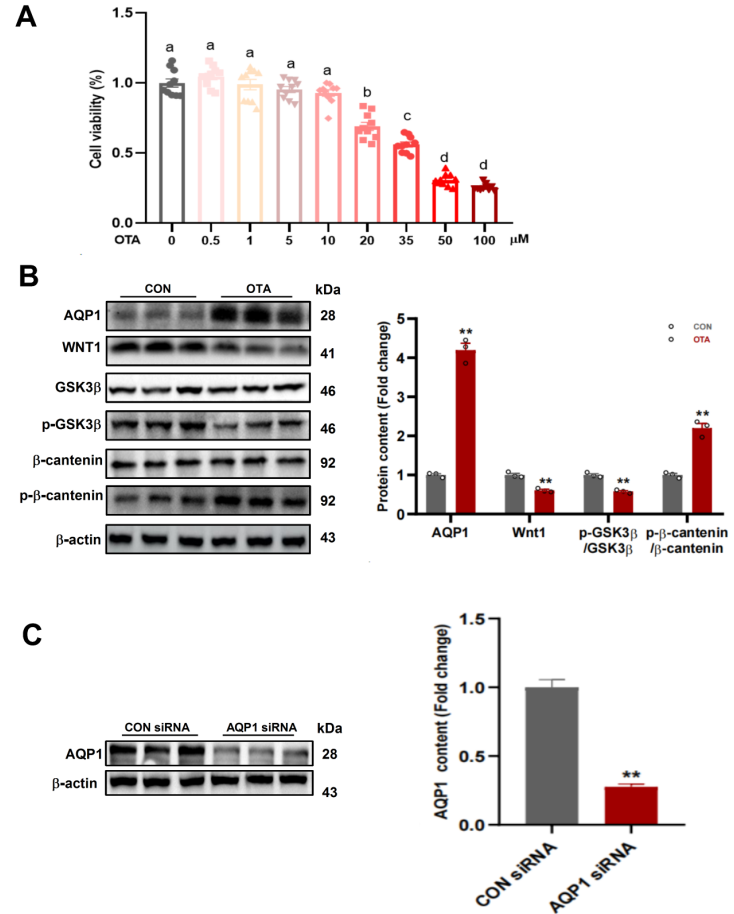


**Fig. S17 Effect of OTA on cell viability and the expression of AQP1/Wnt signaling pathway in HT-22 cells.**

(A) Cell viability; (B) Protein expression of AQP1/Wnt signaling pathway; (C) AQP1 protein expression after transfection with AQP1 siRNA. Values are mean ± SE; ***P* < 0.01, compared with CON group; different letters represent significant differences.


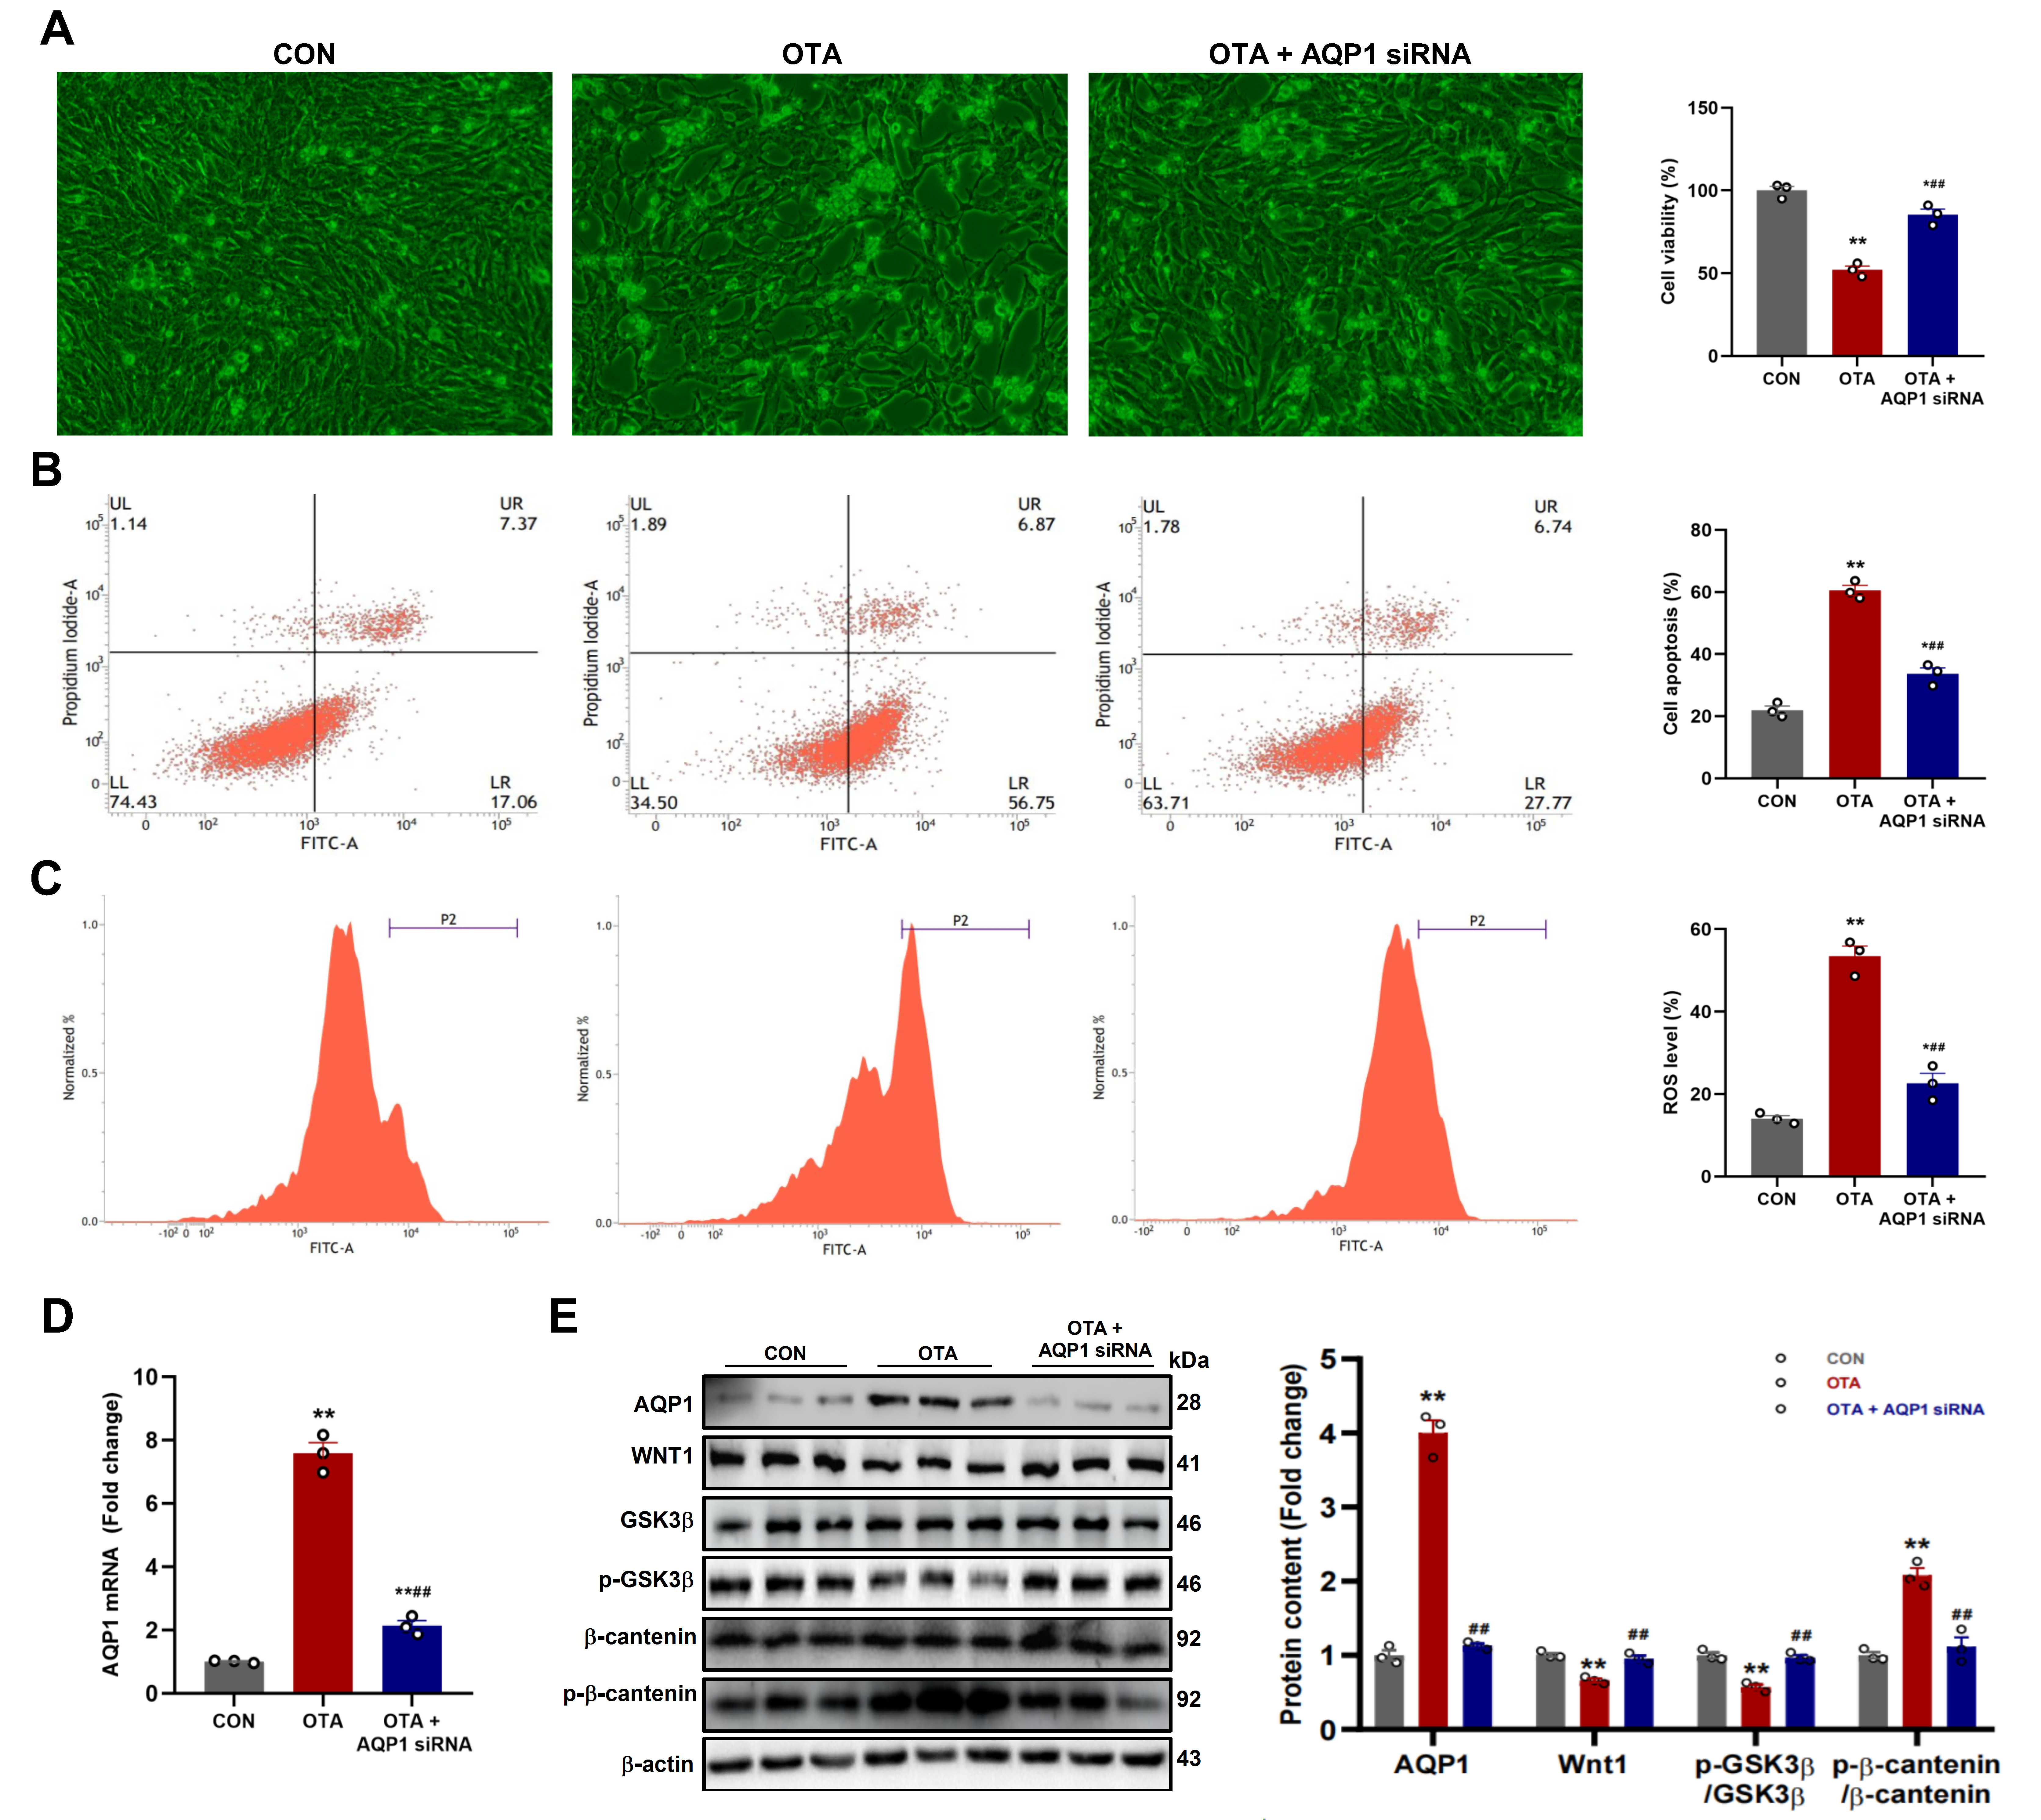


**Fig. S18 Cell apoptosis and ROS level after transfection with AQP1 siRNA in HT-22 cells.**

(A) Cell number and viability; (B) Cell apoptosis; (C) ROS level; (D) AQP1 mRNA expression; (E) Protein expression of AQP1/Wnt signaling pathway. Values are mean ± SE; **P* < 0.05, ***P* < 0.01, compared with CON group, **#***P* < 0.05, **##***P* < 0.01,compared with OTA group.
